# 1 The influence of biotic and abiotic drivers on arthropod co-occurrence 2 network topology in native forest remnants in the Azores

3 Authors: Gabor Pozsgai<sup>1</sup>, Pedro Cardoso<sup>1,2</sup>, François Rigal<sup>1,3</sup>, Mário Boieiro<sup>1</sup>, Rosalina Gabriel<sup>1</sup>, Eduardo  
4 Brito de Azevedo<sup>4</sup> & Paulo A. V. Borges<sup>1</sup>

5 1-Ce3C - Centre for Ecology, Evolution and Environmental Changes, Azorean Biodiversity Group, CHANGE  
6 – Global Change and Sustainability Institute, University of the Azores, Faculty of Agricultural Sciences and  
7 Environment, Rua Capitão João D`Ávila, São Pedro, 9700-042, Angra do Heroísmo, Terceira, Açores,  
8 Portugal.

9 2-LIBRe – Laboratory for Integrative Biodiversity Research, Finnish Museum of Natural History, University  
10 of Helsinki, P.O.Box 17 (Pohjoinen Rautatiekatu 13), 00014 Helsinki, Finland.

11 3-CNRS - Université de Pau et des Pays de l'Adour - E2S UPPA, Institut Des Sciences Analytiques et de  
12 Physico Chimie pour L'environnement et les Matériaux UMR5254, 64000, Pau, France.

13 4-Group of Climate, Meteorology and Global Change from the Institute of Research and Technologies for  
14 Agriculture and Environment (IITAA) from the University of the Azores. Faculty of Agriculture and  
15 Environment

16

## 17 Abstract

18 Island biota are in imminent threat from anthropogenic impacts. Of these impacts the negative effects  
19 of exotic species on the taxonomic and functional diversity of the local fauna are of particularly major  
20 concern. Aside from their impact on the diversity of native fauna, exotics may also have a detrimental  
21 effect on native interactions which, in turn, can destabilise ecological networks. Species co-occurrence

22 networks are used to predict ecological interaction networks and utilised as tools to assess  
23 environmental impacts on community structure. Here, we investigate the topological differences of the  
24 arthropod co-occurrence networks among native forest fragments from seven Azorean islands and  
25 reveal the influence of the abiotic environment and exotic species on these networks. We found that co-  
26 occurrence networks were sensitive to environmental and community dissimilarities, showing a clear  
27 separation between islands and pinpointed differences between indigenous and exotic networks. Most  
28 exotics are little connected and exotic networks have a large proportion of unconnected species. The  
29 resulting decreased connectance and the increased modularity with the increase of the proportions of  
30 exotics in the networks suggests that most exotics have too low prevalence to show associations with  
31 other species, and only a few dominants drive co-occurrences. Moreover, the proportion of negative  
32 links, as indicators of competition, did not increase with the increase of exotics in the habitats,  
33 suggesting that exotics occupied empty niches when they colonised native forest remnants. However,  
34 when the theoretical networks consisting of only indigenous species were investigated both the number  
35 of negative associations and modularity increased with the increase of exotics, suggesting obscure  
36 competition and processes of network degradation. Since our study provides ample evidence for the  
37 usefulness of co-occurrence network analysis in studying island ecosystems, we recommend the use of  
38 this tool for ecosystem assessments, early warning systems and decision making in island biodiversity  
39 conservation.

## 40 Significance statement

41 Global anthropogenic biodiversity decline affects islands to a disproportionately greater extent than  
42 other ecosystems. One major cause of declining island biodiversity is the spread of exotic species which  
43 may overcompete and replace native biota. In this study, we show, by using arthropod species co-  
44 occurrence networks from the Azorean archipelago, that species association patterns reflect both

45 abiotic and biotic impacts and that the increasing proportion of exotics in an ecosystem seemingly has  
46 little impact on association networks at large. However, when the effects on the association network of  
47 solely indigenous species were scrutinised, signs of network degradation were observed, suggesting an  
48 obscure, and most likely slow, negative impact of exotics on native arthropod assemblages. This  
49 disintegration of the co-occurrence networks can be the first sign of disappearing interaction links  
50 which, in turn, may jeopardise ecosystem function and can lead to regime shifts. In this work, we used a  
51 unique long-term dataset collected across the islands of the Azorean archipelago with standardised  
52 methodology. We built on the deep knowledge gathered over two decades on the ecology of species, as  
53 well as on the ongoing processes shaping the islands' arthropod fauna, yet took a novel methodological  
54 approach and disentangled hidden ecological processes of great ecological and conservation concern.

## 55 **Keywords**

56 exotic species, network complexity, modularity, island introductions, native fauna

57

## 58 Introduction

59 Plant and animal biodiversity are declining worldwide due to human-induced stresses and insects, as the  
60 most diverse animal taxon, are critically impacted (Seibold et al. 2019, Wagner 2020, Cardoso et al.  
61 2020, Hallmann et al. 2021). Current changes in insect species abundances with numerous extinctions  
62 are caused in different degree by habitat loss (including for agriculture), pollution (including pesticides),  
63 invasive species, climate change, direct exploitation and co-extinction of dependent species (Wagner  
64 2020, Cardoso et al. 2020). Due to their isolated nature and fragile ecosystems, with a high number of  
65 endemic species, islands are particularly threatened by these anthropogenic stressors and thus their  
66 native species decline at an unprecedented pace (Gillespie and Roderick 2002, Fernández-Palacios et al.  
67 2021). Whilst worldwide species declines can stem from a broad range of causes, the majority of threats  
68 to native flora and fauna on islands originates from two major sources: disappearing natural habitats  
69 due to changes in land use and the introduction of exotic species (Cardoso et al. 2010, Triantis et al.  
70 2010, Borges et al. 2019, Pyšek et al. 2020, Fernández-Palacios et al. 2021). Whereas habitat destruction  
71 most commonly results in direct loss of species, and is relatively easy to quantify and test its effects, the  
72 consequences of spreading exotics are more difficult to study as it requires data on species interactions  
73 (Sax et al. 2002, Borges et al. 2020). These processes are thus more complex to measure, and the subtle  
74 changes can often only be unveiled by detailed community analysis. One of the first signs of such  
75 community changes is the altered network structure of species associations and interactions (Delmas et  
76 al. 2019). Indeed, interactions between species tend to break up on environmental stress sooner than  
77 species get extinct or communities change substantially (Valiente-Banuet et al. 2015). Conventional  
78 species richness or diversity-based studies may therefore be less effective in detecting changes than  
79 those scrutinizing interspecific relationships, such as associations between species pairs (Kay et al.  
80 2018).

81 Undeniably, species do not live in isolation, they form ecological associations and from these  
82 associations ecological interactions emerge. These interactions underpin ecological functions, most of  
83 which are crucial in delivering the ecosystem services humans vitally depend on (e.g. Albrecht et al.  
84 2014, Hines et al. 2015). Since biodiversity decline and homogenisation unfolds in degrading interaction  
85 networks (Laliberté and Tylianakis 2010, Burkle et al. 2013), which, in turn, decreases the stability and  
86 resilience of ecosystems and results in loss of biodiversity function (Valiente-Banuet et al. 2015), the  
87 importance of the protection of healthy ecological networks has been increasingly recognised (Tylianakis  
88 et al. 2010, Heleno et al. 2020). Hence, there is an urgent need to understand how anthropogenic  
89 impacts drive changes in interaction networks in order to precisely assess the effect of these altered  
90 networks on ecosystem functions. However, despite the considerable amount of research to investigate  
91 the anthropogenic impact on island biodiversity (Fernández-Palacios et al. 2021), little is known how  
92 anthropogenic influence impacts the interactions of species within insular communities. Different  
93 examples on how introduced exotic species can encroach indigenous network and sometimes even  
94 replace native species have been documented (García et al. 2014) though.

95 Since interaction networks are notoriously difficult to discover, a simple mapping of species associations  
96 based on their co-occurrence is often used as a proxy to predict interactions (e.g. Bohan et al. 2011,  
97 2017). Although links in association networks not necessarily reflect biotic interactions (Blanchet et al.  
98 2020), these networks nevertheless proved to be sensitive to environmental differences (Araújo et al.  
99 2011, Lima-Mendez et al. 2015, Pozsgai et al. 2016) and to reflect anthropogenic impacts (e.g. Veech  
100 2006, Kay et al. 2018, Elo et al. 2020). Thus, investigating relatively well-documented island faunas  
101 through co-occurrence networks offers an evident way to study how environmental factors shape local  
102 community assemblage structure and to predict the impact these factors can have on interaction  
103 networks. Analysing the structure (topology) of these co-occurrence networks can both facilitate the  
104 early detection of degrading effects and pinpointing the most vulnerable species and the most

105 threatening exotics which, in turn, has the potential to inform stakeholders and decision-makers to  
106 maximize the success of conservation management (Delmas et al. 2019).

107 The Azores archipelago has been under intensive anthropogenic influence for nearly 600 years, with  
108 most of its native habitat areas being converted to agricultural landscapes (Triantis et al. 2010) and a  
109 high number of exotic species introduced (Borges et al. 2010). Taxonomic, functional and phylogenetic  
110 diversity patterns and community structures of Azorean arthropods have been widely studied (Borges et  
111 al. 2005, 2016, Rigal et al. 2018), but little attention focused on ecological networks of interspecific  
112 associations (Rego et al. 2019, Valido and Olesen 2022). Yet, the availability of this unique dataset on the  
113 arthropods of the Azores provides an opportunity to map detailed co-occurrence networks and compare  
114 them among islands and relate them to biotic and abiotic environmental factors.

115 We hypothesize that although species pools among the Azorean islands are highly similar, due to the  
116 presence of single island endemics the co-occurrence networks differ between islands (**H1**). We predict  
117 that island association network structure will depend on the size of habitat remnants and their  
118 proportion in the landscape as well as on the size of the island (**P1**). Moreover, island association  
119 network topologies are also likely to be driven by abiotic factors, such as temperature, precipitation, or  
120 altitude range (**P2**).

121 The other important factor potentially influencing the topology of co-occurrence networks is the  
122 number and the proportion of non-native species in the community. Exotics in the Azores spread rapidly  
123 (Borges et al. 2020) and although they have the potential to decrease the functional diversity of  
124 assemblages (Boyer and Jetz 2014), exotics were found to increase the functional space of native  
125 arthropod fauna in the Azorean ecosystems (Whittaker et al. 2014). The role they play in ecological  
126 networks, and how their ratio compared to native fauna influences network structure is yet to be  
127 determined. Thus, we hypothesized that association assembly between exotics and natives follows non-

128 random organisation rules (**H2**) and that exotic species influence the structure of co-occurrence  
129 networks (**H3**). We predict that native and exotic species will not have the same role in the network,  
130 thus their node properties will differ, (**P3**) and that the topology of the theoretical networks consisting  
131 of exotic species only will have structural peculiarities (e.g. differing degree distribution) (**P4**).  
132 Biotic stress (i.e. increased competition) can cause species to become rare, which results in these  
133 species sharing fewer sites with others and thus having fewer co-occurrence links. Ultimately, these  
134 species will not reach the detection threshold in samples and will be exempted from the networks (Kay  
135 et al. 2018). This leads to a significant decline in the number of nodes but not so much in the number of  
136 edges because of the low number of links to other species of the exempted species. Furthermore, the  
137 introduction of exotics increases the number of species (nodes) but, since they are most commonly  
138 habitat generalists, they are likely to co-occur with many other species, thus increasing the number of  
139 interspecific associations (edges) at a greater pace than that of nodes (Fridley et al. 2007). Since both  
140 processes increase the realised associations to all potential associations ratio (connectance), we  
141 predicted that the connectance will increase, and the modularity decline, with the increasing number of  
142 exotics (**P5**). We also anticipated that, if competitive exclusion is a major factor driving associations, the  
143 proportion of negative edges among all edges will increase with the increasing number of exotics (**P6**).

## 144 Materials and Methods

145 Arthropod sampling followed the 'Biodiversity of Arthropods from the Laurisilva of the Azores' (BALA)  
146 protocol (Borges et al. 2005, 2006, 2016, Gaspar et al. 2008). Arthropods were collected in native  
147 Laurisilva forest remnants on seven islands of the Azores archipelago (Faial, Flores, Pico, Santa Maria,  
148 São Jorge, São Miguel, Terceira, Figure 1) from 1999 to 2002 (BALA I) (Borges et al. 2005) and in 2010  
149 and 2011 (BALA II) (Borges et al. 2016). Altogether unique 91 transects were sampled, at 116 sampling  
150 occasions, 81 in BALA I and 35 in BALA II. Twenty-five sites from BALA I were repeatedly sampled in

151 BALA II. In order to maximise the coverage of sampled diversity, two complementary methods were  
152 applied: pitfall trapping was used to sample ground-dwelling arthropods and vegetation beating was  
153 used to collect canopy-dwelling arthropods. In each forest patch, 30 pitfall traps were placed along a  
154 150-meter long transect. Of the 30 traps, 15 were filled with Turquin (a mixture of dark beer, chloral  
155 hydrate, formalin and glacial acetic acid) and the other 15 with ethylene-glycol. In each transect, ten  
156 beating samples were taken from the three most common native woody plant species. The most  
157 common trees and shrubs sampled were *Juniperus brevifolia* (Cupressaceae), *Erica azorica* (Ericaceae),  
158 *Ilex azorica* (Aquifoliaceae), *Laurus azorica* (Lauraceae) and *Vaccinium cylindraceum* (Ericaceae) (Ribeiro  
159 et al. 2005, Gaspar et al. 2008).

#### 160 *Environmental variables*

161 The environmental variables were obtained from the CIELO model (Azevedo et al. 1999). This is a  
162 physical model based on the transformations experienced by an air mass crossing over a mountain, and  
163 simulates the evolution of an air parcel's physical properties starting from the sea level up to the  
164 mountain. The model has been developed in order to produce high-resolution fields of the elemental  
165 climatic variables (pressure, temperature, rainfall, relative humidity, etc.) using a grid resolution of 100  
166 by 100 m cell size (for more detail see also Borges et al., 2006).



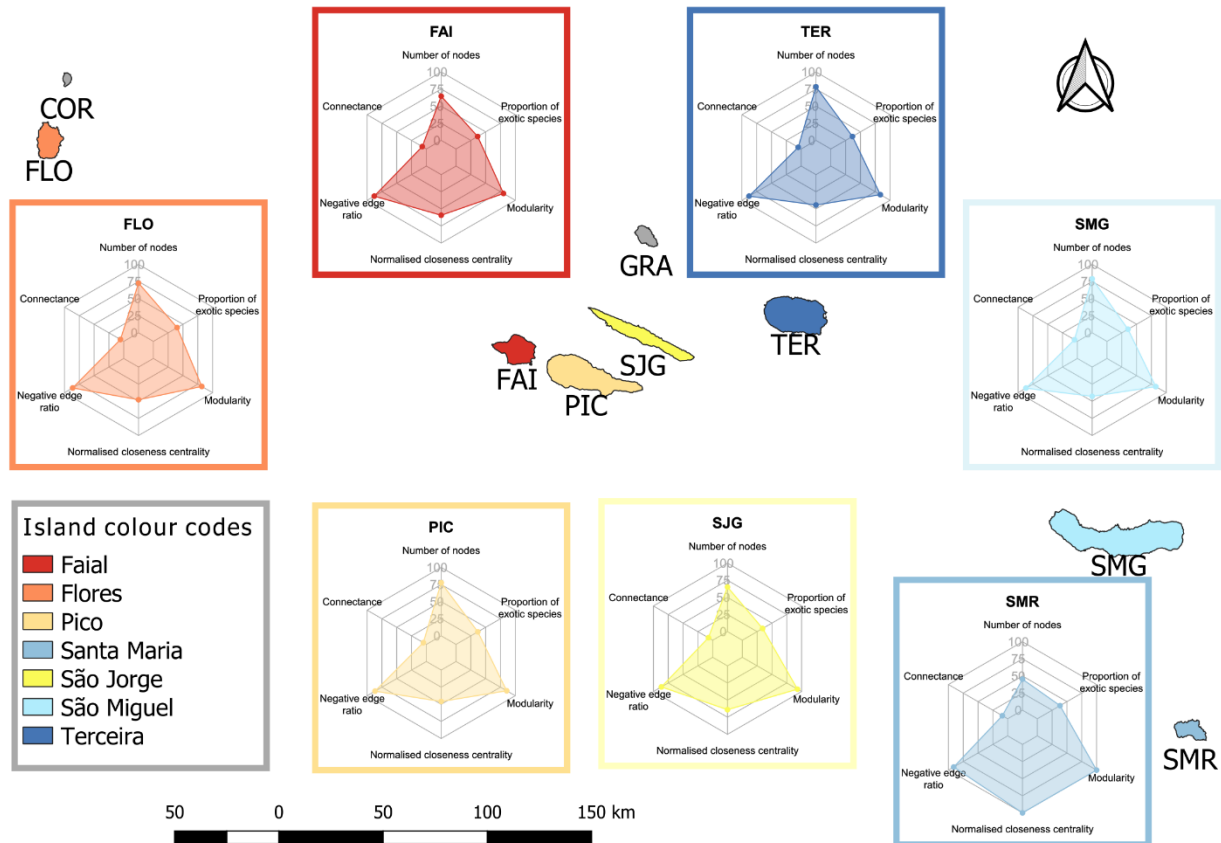

167  
 168 **Figure 1. Map of the Azorean archipelago and the basic characteristics of the island co-occurrence**  
 169 **networks. Islands are colour coded and squares with borders of corresponding colours contain radar**  
 170 **charts showing (clockwise from the top) 1) the percentage of island species richness to the species**  
 171 **richness in the meta-network, 2) the percentage of exotic species to the island species richness, 3) the**  
 172 **island modularity as a percentage of the maximum modularity of all islands, .4) the normalised**  
 173 **closeness centrality of the island as a percentage of the maximum normalised closeness centrality of**  
 174 **all islands, 5) the percentage of negative edges of all edges in an island, 6) connectance of a network.**  
 175 **Island abbreviations: FAI – Faial, FLO – Flores, PIC – Pico, SJG – São Jorge, SMG – São Miguel, SMR –**  
 176 **Santa Maria, TER – Terceira.**

177

178 *Network estimation and statistical analysis*

179 A species-site matrix was used as a baseline dataset to generate a large meta-network, containing all

180 species abundance data collected from all islands and sampling sites with the two sampling periods

181 separated. When the ecological functions of adults and juvenile stages were substantially different,

182 adults and juveniles of the same species were recorded separately (e.g. Lepidoptera). Based on Borges

183 et al (2016), each species was categorised as either endemic, non-endemic but native (termed as native  
184 henceforth), or exotic species, and higher taxonomic levels, such as family, order, and class, were also  
185 assigned to them. Natives and endemics were sometimes merged and referred together as 'indigenous'  
186 species. Species whose nativity status was unknown remained included in the overall species numbers  
187 but they were not categorised into either indigenous or exotics and thus they did not inflate the number  
188 of any of those groups. Species with less than ten individuals in overall abundance and those occurring  
189 at less than three sampling sites were removed and excluded from the further analysis.

190 Due to methodological constrains, abundances were converted to binary (i.e. presence-absence) data  
191 and were used in the co-occurrence analysis. Two co-occurrence networks, one for the years of BALA I  
192 and one for those of BALA II, were generated using the *cooccur* package (Griffith et al. 2016) in an R  
193 programming environment (R Core Team 2012). The union of the two networks (i.e. merging all nodes  
194 and edges from both networks), a meta-network, consisting of species (represented as nodes) and their  
195 predicted associations (represented as links or edges) served as a base of our further analysis.

196 The association detecting method provided by the R package uses a probabilistic model based on  
197 hypergeometric distribution to assess if species co-occur more or less frequently than expected by  
198 mathematical chance. If a species pair occurs more often than random choice would predict, the  
199 association between them is considered as positive. On contrary, if the observed co-occurrence  
200 frequencies are lower than expected from random associations, they are considered as negatively  
201 associated. A network of positive and negative links between species nodes is thus formed by iterating  
202 through all potential species combinations. The probability for the species pair occurring together, as  
203 well as the p-values for the association being negative or positive, are given. Species and corresponding  
204 species pairs, which were expected to have less than one co-occurrence were removed prior to analysis.  
205 Species pairs with completely random association (i.e. p-value > 0.05) and those with less than 25%  
206 probability of co-occurring were removed from the generated network.

207 A series of 999 Erdős-Rényi random graphs with the same node number as our meta-network were  
208 generated, their degree distributions were calculated and compared to the empirical degree distribution  
209 of our meta-network to estimate the probability that our co-occurrence network is a random graph.

210 The meta-network was first split into seven subnetworks (henceforth island subnetworks). For each  
211 island, only species occurring on that particular island were selected to the subnetwork as nodes, and  
212 edges linking those species were retained from the meta-network. Subnetworks for each sampling site  
213 (termed as site subnetworks hereafter) were also generated, using the same method. These sub-  
214 networks were used when island networks, indigenous and exotic networks, and the node properties of  
215 native and exotic species were compared (see below).

216 Commonly used measures to characterise network topological properties, such as the number of nodes  
217 and edges, connectance, proportion of negative links, the proportion of isolated nodes, mean closeness  
218 and betweenness centralities, and modularity (based on the ‘fast and greedy’ community detection  
219 algorithm) were calculated. Similarly, node characteristics, such as the number of edges connecting  
220 other nodes (degree), the proportion of degree to the number of all nodes (relative degree); the number  
221 of negative edges (vulnerability) and the proportion of those to the relative degree (relative  
222 vulnerability); betweenness, closeness centralities were also computed, with the help of the igraph  
223 package (Csárdi and Nepusz 2006). Since most of these measures strongly depend on the number of  
224 nodes (i.e. show high correlation), a z-score normalised version of each centrality measure was also  
225 calculated. During the process of excluding highly correlating variables (Spearman’s  $p < 0.05$ , Spearman’s  
226  $Rho > 0.6$  or Spearman’s  $Rho < -0.6$ ) non-normalised versions of these variables were discarded and only  
227 normalised values were included in the analysis. The process of network generation and the description  
228 of all calculated network measures, the way how they were calculated, and their correlations are given  
229 in Supplementary Material 1.

230 All network properties were calculated for each subnetwork, and node properties were calculated in  
231 each subnetwork separately to all species, indigenous and introduced.

232 Site networks were used to compare island networks and to investigate their relationship to the island  
233 area, the total native forest area, and the native forest to island area ratio, as well as to island-specific  
234 climatic variables and the number of exotics and their ratio to the total species richness on the islands.  
235 Significantly highly correlating environmental variables (Spearman's  $p < 0.05$ , Spearman's  $Rho > |0.6|$ )  
236 were removed prior to the analysis. Since there is no settled methodology to compare networks to each  
237 other, two different approaches were taken: 1) island networks were compared based on their  
238 associated species pairs, where distance matrices were calculated using the Jaccard distance on  
239 presence-absence matrices of species associations; and 2) based on the differences in their calculated  
240 network properties. In this latter case, similarity matrices were calculated using the Euclidean distances  
241 of z-score scaled network properties. Environmental variables were also z-score scaled and a stepwise  
242 redundancy analysis (dbRDA) process was conducted to find the optimal model. Whether or not island  
243 networks topologies were significantly different was tested using the corresponding distance matrices in  
244 an Analysis Of Similarities (ANOSIM) test with 10000 permutations, with the help of the *anosim()*  
245 function implemented in the *vegan* (Oksanen et al. 2010) R package. To controlling Type I Error arising  
246 from multiple comparisons, p-values in pairwise comparisons were adjusted using the false discovery  
247 rate (FDR) correction.

248 To test if link formation between either combination of endemic, native, and introduced species  
249 occurred non-randomly, we generated 5000 networks in an iterative process with keeping the original  
250 network structure but randomly assigning the origin status to species. The proportion of each  
251 combination pair to the overall link number was calculated and one-sample t-tests were used to  
252 compute p-values to determine if association frequencies between categories of native status can be  
253 random. A similar permutational approach was used to test whether or not some combinations of

254 categories of native status are more or less likely to collect negative links than it would be expected  
255 from random processes. In this latter case though the ratio of the negative links to the number of links  
256 within each combination pair was calculated and compared to the randomised distribution, using one-  
257 sample t-tests. To investigate if there are differences in the frequency of endemic, native, and  
258 introduced species having association links with each other we compared the number of links between  
259 each combination using Kruskal-Wallis tests, and pairwise Wilcox-tests with p-values adjusted according  
260 to the FDR method.

261 The relationship between major network topology measures and the number and the proportion of  
262 exotics in the communities was investigated using linear mixed models with the island identity set as the  
263 random term using the `lmer()` function in the `lme4` package (Bates et al. 2015 p. 4). All proportion  
264 variables were square-root transformed prior to regression to approximate normality. P-values were  
265 estimated according to Satterthwaite's method, as implemented in the `lmerTest` package (Kuznetsova et  
266 al. 2017) in R. Marginal and the conditional R<sup>2</sup> values were extracted using the `r.squaredGLMM()`  
267 function in the `MuMIn` package (Barton 2020). Since indigenous and exotic species richness strongly  
268 correlated, to better disentangle the effects of exotics, similar models as above were fitted on networks  
269 consisting of native species only and residuals from these models were used to re-fit models between  
270 node properties and the number and proportion of exotics.

271 Both network-related and node-related properties were compared between native and exotic species  
272 using Kruskal-Wallis tests and pairwise Wilcox tests with p-values adjusted for multiple testing according  
273 to the FDR method. Linear mixed-models as above were used to investigate the effect of exotics (both  
274 number and proportion in the whole community) on indigenous networks only.

## 275 Results

276 Our initial meta-network consisted of 161 nodes (species) and 398 edges, giving a 0.031 edge density  
277 value. Of all species, 101 (52 endemics and 49 natives) were indigenous, 58 exotic, and 2 with an  
278 unknown origin. Positive associations overwhelmingly dominated the meta-network (345 and 53  
279 positive and negative links, respectively). The edge density and degree distribution of our meta-network  
280 were significantly different from those that could have arisen from random networks. The degree of  
281 nodes ranged from 1 to 44 with *Argyresthia atlanticella* Rebel, 1940, a moth species endemic to the  
282 Azores, having the highest degree. *Lasius grandis* Forel, 1909, a native ant, and *Palliduphantes schmitzi*  
283 (Kulczynski, 1899), an endemic spider, had the most negative link to other species (Figure 2,  
284 Supplementary material 2).

## 285 Differences in island network topologies and driving factors

286 Islands networks significantly differed based on their topology measures (ANOSIM  $p < 0.001$ ,  $R = 0.175$ ).  
287 After correcting for multiple comparisons, several pairwise differences between islands still remained  
288 significant at the  $p < 0.05$  significance threshold (Figure 3A-B). Although the number of nodes and the  
289 number of edges were significantly different between islands (Kruskal-Wallis test,  $p = 0.04$  and  $p = 0.02$ ,  
290 respectively), pairwise differences were not supported statistically. The connectance, the ratio of the  
291 isolated nodes to all nodes, the relative vulnerability, normalised closeness and betweenness  
292 centralities, and modularity, on the other hand, showed significant pairwise differences (Figure 1B,  
293 Supplementary material 3). The number and proportion of the exotics on the islands, modelled mean  
294 altitude, and the annual mean precipitation were the main factors driving these differences (dbRDA  
295 model was significant at the  $p=0.003$  level and explained 15.9% of constrained inertia) (Figure 3C). When  
296 island networks were compared based on their association pairs, they differed significantly (ANOSIM  $p$   
297  $< 0.001$ ,  $R = 0.229$ ) but differences between individual islands were different than those when island

298 networks were compared based on their topology measures (Figure 3D). The major factors driving these  
299 differences were the area of the native forest on an island, annual mean, and summer median  
300 temperatures, and summer precipitation and average relative humidity (dbRDA model was significant at  
301 the  $p < 0.001$  level and explained 19.7% of constrained inertia).

#### Unconnected species

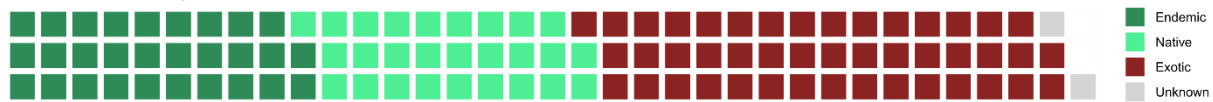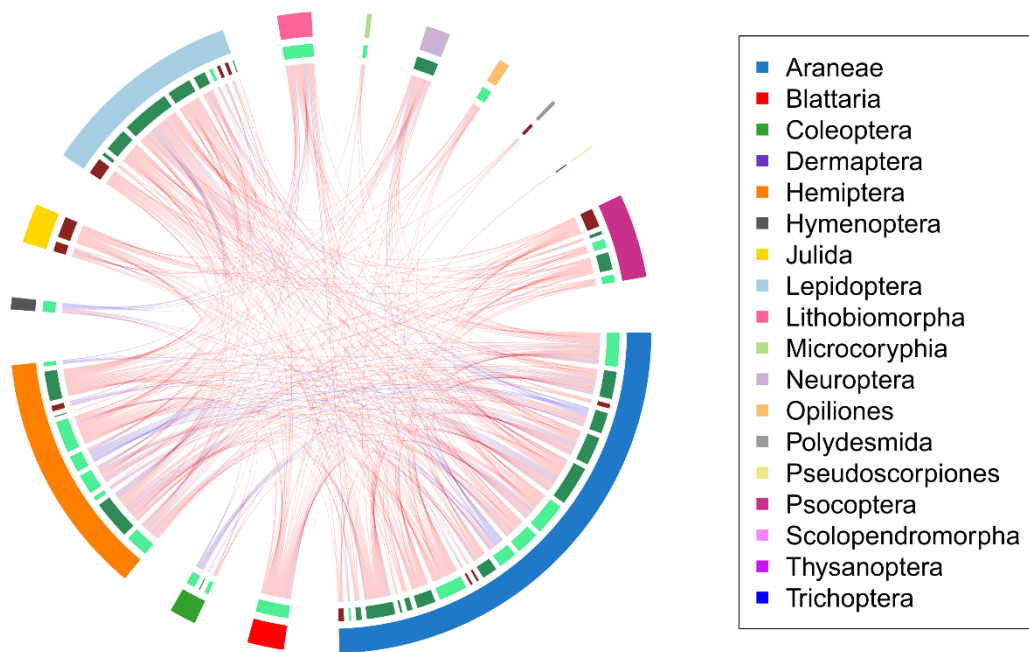

302  
303 **Figure 2. Meta-network coloured according to higher taxa and nativity classes (A), and the number of**  
304 **isolated species, grouped to endemics, natives, exotics, and unknown origins (B). Red links in the**  
305 **network represent positive, blue links negative associations. Outer arc shows arthropod orders, inner**  
306 **arc nativity classes. Arc segment length is proportional to the number of nodes the group has.**

307

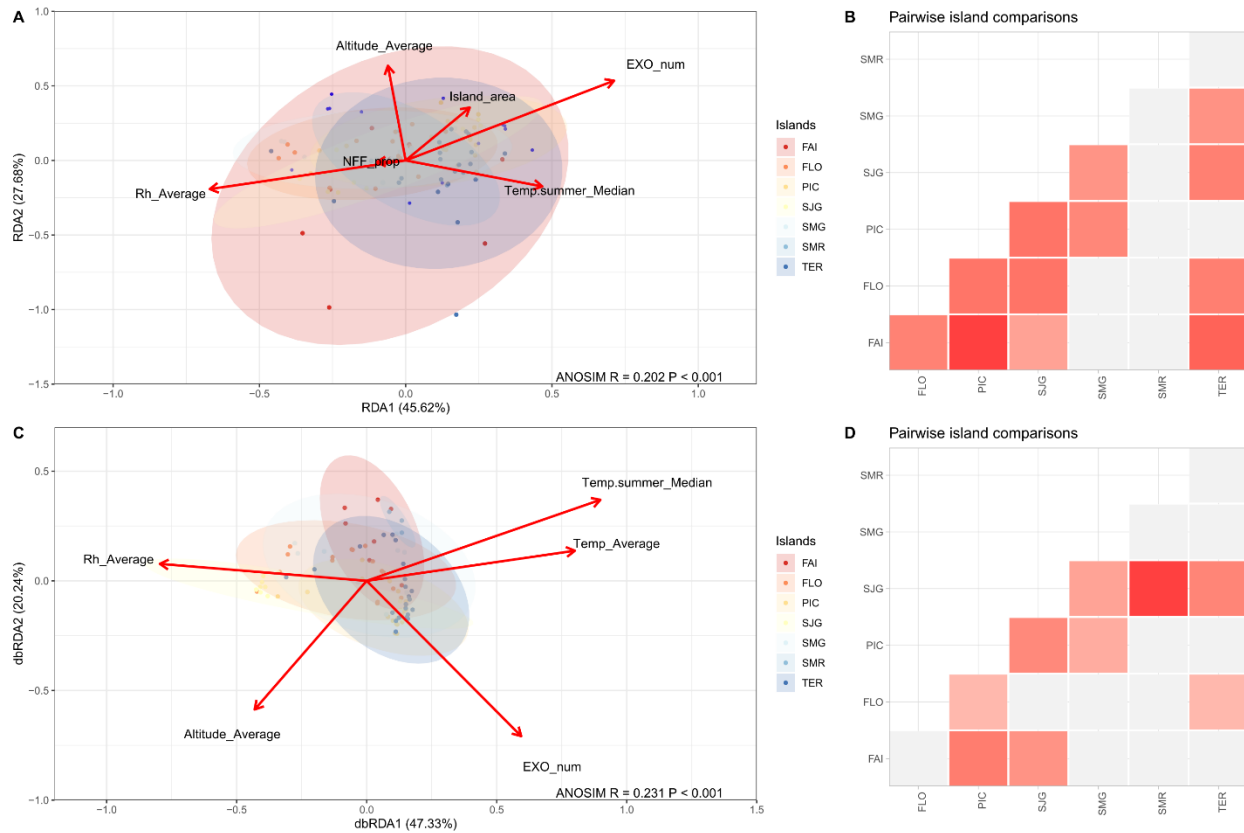

308  
309 **Figure 3. The ordination and pairwise ANOSIM comparison of the island subnetworks based on their**  
310 **network properties (A, B, respectively) and their species pair community (C< D, respectively).**

311

### 312 Effects of exotics on network topology

313 Simulations suggested that endemic to endemic, endemic to native, and native to native edges were less  
314 common in the meta-network than could have arisen in networks with randomly reshuffled nativity  
315 categories. At the same time, introduced species were more linked to the other groups than expected  
316 by chance, including themselves. Moreover, natives had a lower chance than expected to have negative  
317 links to both endemics and other natives. All other combination pairs showed a significantly greater  
318 chance than random to have a higher proportion of negative links with each other (Supplementary  
319 material 4). When linking frequencies were compared, endemic to endemic, native to native and  
320 endemic to native links occurred in greater proportions than exotic to exotic, and exotic to  
321 native/endemic (Figure 4A). In terms of the proportion of negative links, natives had negative



322 associations with themselves or with the other two categories in significantly higher proportions than  
 323 any other combinations. Exotic to exotic negative links occurred in a significantly lower proportion than  
 324 endemic to endemic ones (Figure 4B).  
 325

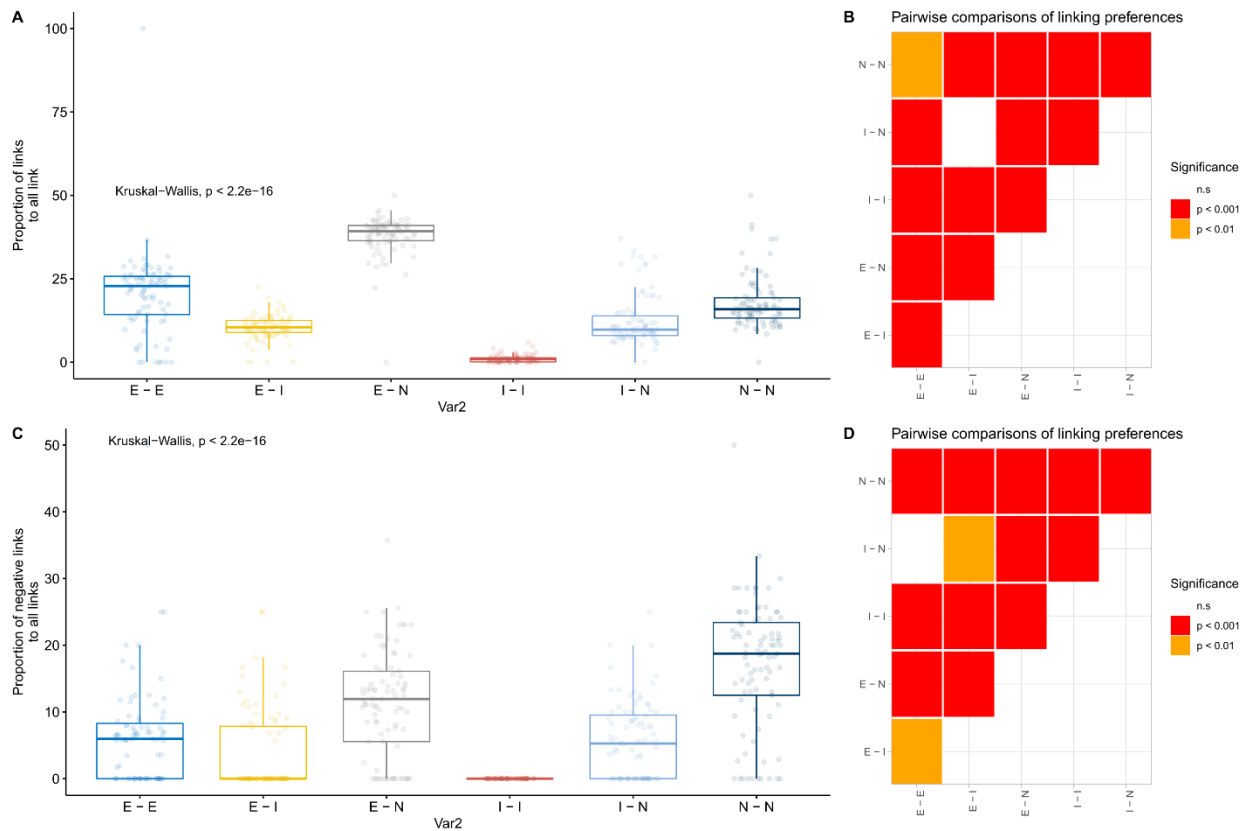

326 **Figure 4. Preferential linking between endemic, native, and exotic species. The distribution of the**  
 327 **proportion of both positive and negative links (A), and negative links only (C) to all links between**  
 328 **nativity category pairs. Pairwise comparisons using pairwise Wilcox tests are shown on the right side**  
 329 **(B, D, respectively). All p-values of pairwise Wilcox tests are adjusted according to the FDR method.**  
 330

331  
 332 Both the number of nodes and edges, as well as the ratio of negative edges showed significantly positive  
 333 relationships with the number of exotics in the networks. On the contrary, the connectance, and the  
 334 normalised closeness and betweenness centralities showed negative relationships (Table 1,  
 335 Supplementary material 5).

336 **Table 1. R<sup>2</sup>, f, and p-values for each network parameter as a function of the number and proportion of exotics in the community. Models ran**  
 337 **for all site subnetworks, site subnetworks consisting of indigenous species only, and for the residuals of the model fit on indigenous species**  
 338 **against the number of exotics.**

339

|                                               |                | Number of nodes | Number of edges | Proportion of isolated nodes | Proportion of negative edges | Mean degree | Connectance | Normalised closeness centrality | Normalised betweenness centrality | Modularity |
|-----------------------------------------------|----------------|-----------------|-----------------|------------------------------|------------------------------|-------------|-------------|---------------------------------|-----------------------------------|------------|
| <b>Full network</b>                           | R <sup>2</sup> | 0.676           | 0.371           | 0.173                        | 0.289                        | 0.217       | 0.445       | 0.303                           | 0.254                             | 0.261      |
| <b>– exotic number</b>                        | F              | 159.371         | 29.589          | 3.814                        | 12.493                       | 2.417       | 63.17       | 38.641                          | 4.093                             | 1.392      |
|                                               | P              | 0               | 0               | 0.054                        | 0.001                        | 0.124       | 0           | 0                               | 0.046                             | 0.241      |
| <b>Full network</b>                           | R <sup>2</sup> | 0.232           | 0.374           | 0.696                        | 0.251                        | 0.649       | 0.336       | 0.206                           | 0.429                             | 0.376      |
| <b>– exotic proportion</b>                    | F              | 14.333          | 42.992          | 149.246                      | 0.029                        | 136.697     | 24.694      | 8.537                           | 25.487                            | 19.625     |
|                                               | P              | 0               | 0               | 0                            | 0.866                        | 0           | 0           | 0.004                           | 0                                 | 0          |
| <b>Native network – exotic number</b>         | R <sup>2</sup> | 0.36            | 0.291           | 0.35                         | 0.256                        | 0.227       | 0.392       | 0.307                           | 0.37                              | 0.206      |
|                                               | F              | 41.103          | 15.74           | 5.89                         | 0.058                        | 2.807       | 45.073      | 30.493                          | 4.241                             | 4.446      |
|                                               | P              | 0               | 0               | 0.018                        | 0.81                         | 0.098       | 0           | 0                               | 0.043                             | 0.038      |
| <b>Native network – exotic proportion</b>     | R <sup>2</sup> | 0.282           | 0.38            | 0.455                        | 0.378                        | 0.521       | 0.254       | 0.179                           | 0.308                             | 0.275      |
|                                               | F              | 26.842          | 42.484          | 26.001                       | 20.954                       | 70.384      | 8.471       | 8.905                           | 1.123                             | 19.351     |
|                                               | P              | 0               | 0               | 0                            | 0                            | 0           | 0.005       | 0.004                           | 0.293                             | 0          |
| <b>Full network residuals – exotic number</b> | R <sup>2</sup> | 0.597           | 0.063           | 0.199                        | 0.034                        | 0.233       | 0.197       | 0.106                           | 0.065                             | 0.128      |
|                                               | F              | 117.742         | 5.992           | 22.078                       | 3.112                        | 27.022      | 21.813      | 10.502                          | 6.162                             | 13.088     |
|                                               | P              | 0               | 0.016           | 0                            | 0.081                        | 0           | 0           | 0.002                           | 0.015                             | 0          |

340

341 However, when relationships between these measures and the proportion of exotic species in the  
342 community were tested, only the proportion of isolated nodes and modularity revealed significantly  
343 positive relationships but the number of nodes and edges, the mean degree, the ratio of negative edges,  
344 the normalised betweenness centrality, and the connectance showed significantly negative  
345 relationships. Relationships showed similar patterns when the proportions of exotics were fitted against  
346 the residuals of the model fitted on the proportions of exotics against the properties of indigenous-only  
347 networks (Table 1, Supplementary material 6).

#### 348 [Differences between the node properties of indigenous and exotics](#)

349 The mean and the relative degree, the normalised closeness and betweenness centralities, as well as the  
350 number and ratio of positive links to other species, were greater for indigenous species in the meta-  
351 network. However, indigenous and endemics only showed significant differences in their normalised  
352 closeness centrality once isolated nodes (degree=0) were removed (Supplementary material 7)

#### 353 [Differences in native and exotic networks](#)

354 When island subnetworks were split into networks consisting of only indigenous or exotic species,  
355 differences emerged. Since there were more indigenous species than exotic, network topology  
356 measures highly correlated to node number (such as number of edges, number of positive links, mean  
357 degree etc.) were also significantly greater for native networks. Albeit they had no or little correlation to  
358 the number of nodes, the proportion of isolated nodes, the connectance, and the normalised closeness  
359 and betweenness centralities also showed differences (Figure 5).

360 When we investigated the effects of exotics on indigenous networks only, we found that number of  
361 nodes (species number) and edges decreased with increasing exotic proportion. Exotics had a similarly  
362 negative relationship with the mean degree and the normalised betweenness centrality. A positive

363 relationship was visible between the proportion of exotics and the proportion of isolated nodes, the  
364 connectance, the normalised closeness centrality, and the modularity (Supplementary material 8).  
365

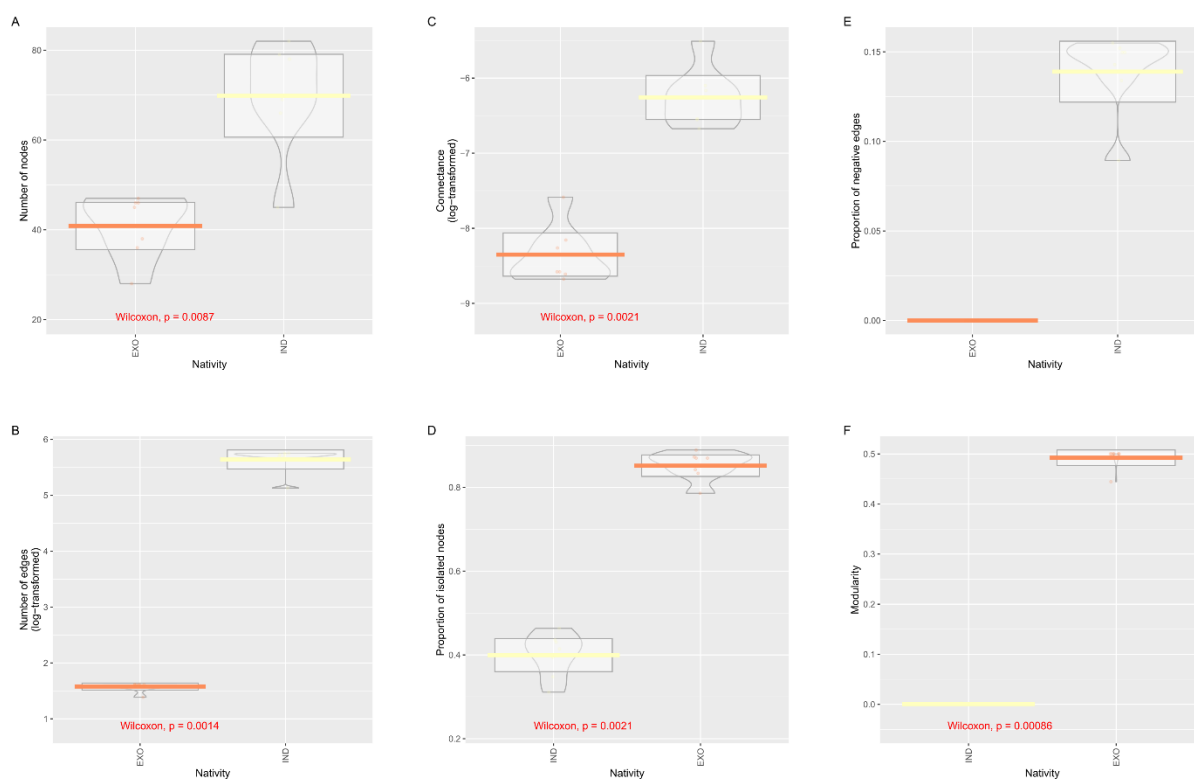

366 **Figure 5. Comparison of network properties between indigenous-only and exotic-only networks:**  
367 **number of nodes in the network (A), number of edges in the networks (B), the log-transformed value**  
368 **of connectance (C), the proportion of the isolated nodes (D), the proportion of negative edges (E), and**  
369 **the modularity based on the ‘fast and greedy’ community detection algorithm (F). Note that the**  
370 **subnetworks in the figures are ordered according to the mean value of the focal network measure.**  
371

372

## 373 Discussion

374 In this study, we analysed arthropod co-occurrence networks on seven Azorean islands and tested the  
375 hypotheses that these networks reflect biogeographical patterns, are sensitive to abiotic environmental  
376 differences, and that their topological features echo the imprint of exotic species in the community.

377 We found that co-occurrence networks of island arthropods showed non-random structuring patterns,  
378 and that biogeography (i.e. island identity) was reflected on the network structure both when species  
379 pairs, as network building blocks, and when network topological properties were compared (H1). Both  
380 of our first and second predictions (P1, P2) that natural habitat size and abiotic factors drive network  
381 structure in concert, were supported by the multivariate model. Thus, co-occurrence network analysis  
382 seems to be suitable to detect inter-island differences and the dependence of network topology on  
383 environmental factors is clear. Yet, although because island species richness strongly depends on the  
384 size of the island (Whittaker et al. 2017) and natural habitat remnants behave as islands themselves  
385 (Matthews 2021), we predicted natural habitat patch size will influence the structure of the association  
386 networks, our results showed that the size of natural habitat has lower importance in shaping co-  
387 occurrence networks than they have in driving community differences in indigenous Macaronesian  
388 spiders (Cardoso et al. 2010). However, Cardoso et al. (2010) excluded exotic species from their analysis,  
389 and in our cases, the number of exotics dominated the model, thus the disagreement with their findings  
390 can be explained. Moreover, in our study, there was a moderately strong correlation between native  
391 forest patch size and the number of exotics, which may have further obscured the clear effect of forest  
392 patch size. Nevertheless, native habitat area and proportion showed a few, moderately strong,  
393 correlations with network properties (Supplementary material 9), suggesting a limited power of this  
394 variable to predict networks topologies.

395 Both the number and the proportion of exotics in the community influenced the structure of co-  
396 occurrence networks (H3). As suggested by the species-area relationship (Whittaker et al. 2017), the  
397 number of nodes showed a positive correlation with the island area, and so did the number of exotic  
398 nodes. This is in line with the findings of Whittaker et al. (2014), who reported an increasing number of  
399 exotics with increasing island area for both spiders and beetles in the Azores. The proportional increase  
400 of edges did not match the increase of exotic nodes though, mostly because the newly recruited exotics

401 in the communities have no or few links to other species (i.e. the proportion of isolated increased). This  
402 resulted in a general decline in the connectance, and, when the proportion of exotics to the entire  
403 community was investigated, an increase of modularity; the opposite way we predicted (P5). These  
404 trends are more pronounced when the effect of indigenous species is removed, suggesting that  
405 indigenous mitigate changes in association network structure. Moreover, the declining number of nodes  
406 as a function of the proportion of exotics in the community suggests uneven recruitment of new species  
407 into the communities: when species richness increases, newcomers are mostly exotics. The fact that the  
408 proportion of negative links did not show a significant relationship either as a function of the residuals  
409 after the effect of natives had been removed, or when the proportion of the exotics was investigated  
410 (i.e. P6 did not hold up), suggests that these species are rarely involved in direct competition with  
411 indigenous ones. This pattern, and the high proportion of unconnected exotic species, on one hand,  
412 suggest that the majority of the exotics do not occur in samples regularly enough to form detectable  
413 associations with other species; only a few, dominant, exotics contribute to shaping network topologies  
414 (Kay et al. 2018). This is in line with Florencio et al. (2015) who found that faunal homogenisation in the  
415 Azores was not apparent from incidence-based community nestedness investigations, and reasoned  
416 that although the prevalence of dominant exotic species was high, rare exotic species were replaced  
417 both in space and time. On the other hand, our results support the earlier findings (Whittaker et al.  
418 2014) that exotics, instead of competing with indigenous, occupied empty niches and increased the  
419 realised trait space of the community (Rigal et al. 2018). However, the increasing proportion of negative  
420 associations between indigenous species with the increasing proportion of exotics suggests an  
421 increasing indigenous to indigenous competition as the effect of exotics.

422 We also showed a strong preferential linking in the community, and consequently, the assembly  
423 structure was not random (H2). Endemic and native species linked to each other more frequently than  
424 to exotics. This is somewhat controversial to what we expected, that since exotics are habitat generalists

425 and occur in many habitats, they will regularly co-occur with all species, and thus have a high number of  
426 links (including negative ones). Similarly to the previous section, the reason for this may be the relatively  
427 low number of exotic species being prevalent enough for association detection. Indeed, although native  
428 habitat fragments are relatively small, most many exotic species may not reach the locations toward the  
429 centre of patches where indigenous are frequent. Whether this happens through the resistance of local  
430 communities to exotics or other reasons is yet to be investigated. Moreover, the number of endemic to  
431 endemic links may have been inflated through species turnover within archipelago due to speciation.  
432 Preferential linking through negative links was not obvious either and the trend in the proportion of  
433 negative links in communities was also unclear (P6), suggesting little niche overlap and competition to  
434 indigenous species in the Azores (e.g. Heleno et al. 2013).

435 Networks consisting of solely indigenous or exotic species also differed, as we predicted (P3). Exotic  
436 species had different node properties than indigenous, but they showed a generally lower number of  
437 links to other species and the proportion of negative links showed a significant relationship with the  
438 number, but not with the proportion of exotics in the community (Thus, P7 was only partially upheld.).  
439 This low degree resulted in lower connectance and centralities, and a greater proportion of isolated  
440 nodes in exotic-only networks, compared to native-only networks (P4). As a consequence, connectance,  
441 indeed, decreased and modularity increased with the increase of the number and proportion of exotic  
442 species in communities (P5). Although, as seen above, these can be the results of exotic species blending  
443 into indigenous communities without competing with indigenous species, from the high modularity of  
444 exotic networks we also may speculate to their lower stability. Indeed, as a number of systems show  
445 early signs of disintegration when stressed, particularly the weak links tend to break easily (Csermely  
446 2004), increasing modularity is anticipated. Alarmingly, in our native-only networks, the modularity also  
447 decreased with the increasing proportion of exotics in the community, as did the proportion of isolated  
448 nodes and negative links. These suggest an obscure process of disintegration of native association

449 networks, driven by the increasing proportion of exotics, which, eventually may grow into a regime shift  
450 (Rocha et al. 2015, Hui and Richardson 2018). This is in line with, Larson et al. (2016) and Hui (2021) who  
451 showed that plant-pollinator interactions and fruit-bird mutualistic networks (respectively) change in a  
452 similar manner when invaded by introduced species. Although co-occurrence networks cannot be  
453 translated to interactions (Blanchet et al. 2020), species pairs that do not co-occur cannot interact  
454 either, and hence these findings are highly concerning and in accordance with the recent observation  
455 that exotic species diversity is increasing in Azorean native forests (Borges et al. 2020). Moreover, the  
456 number of nodes was declining with the increasing proportion of exotics but the connectedness  
457 increased, indicating that less connected species disappeared first, reinforcing the estimations by  
458 Triantis et al. (2010) for a high level of extinction debt on the Azores.

459 Nonetheless, since species occurrences may also correlate with latent environmental factors, for  
460 instance, the adjacent landscape of the natural forest patch, other drivers may also be in action. Thus,  
461 before drawing casual links between exotic species' number and node properties and native species  
462 richness, the underlying causes should be thoroughly investigated.

463 Our study provided ample evidence that island arthropod co-occurrence networks are sensitive to the  
464 presence of exotic species and that the networks of exotic species differ from those of natives. These  
465 structural sensitivities can make species co-occurrence networks ideal tools for providing early warning  
466 signals of community changes induced by exotics. These signalling systems in the Anthropocene are  
467 timely and essential to detect and mitigate deleterious effects of human-induced environmental change  
468 on native habitats (Derocles et al. 2018, Fath et al. 2019). On the other hand, in the last decades, the  
469 amount of biodiversity data multiplied, partly due to the advanced recording technology (e.g.  
470 metabarcoding, environmental DNA), but also due to citizen science efforts. These untapped data could  
471 be utilised for co-occurrence network analysis to understand large-scale ecological assembly rules and  
472 geographic patterns of communities (Lima-Mendez et al. 2015, Ma et al. 2016) as well as for early



473 warning systems in conservation. A cautious approach has to be taken though. In our case, for instance,  
474 negative links between species did not provide a useful measure for the effect of invasive species, most  
475 likely because, as we speculated, the exotic arthropods on the Azores naturalised relatively well and  
476 managed to exploit previously unoccupied niches causing little competition with natives, as it was  
477 reported in the case of disturbed landscape such as managed pastures (Rigal et al., 2018). Whether or  
478 not this process drives the patterns we found in native forests, can only be teased apart through  
479 targeted field experiments.

## 480 Limitations

481 One of the main limitations of this study is inevitably derived from limitations of the method used;  
482 although association networks are relatively easy to construct, they are not real-life interaction  
483 networks, merely the predictions of them (Blanchet et al. 2020, Strydom et al. 2021). This is particularly  
484 true because co-occurrence networks are scale dependent; although our sampling transects were  
485 relatively small (150m), less mobile or microhabitat restricted species are unlikely to interact even at  
486 that spatial scale. Therefore, a deeper insight is needed into the pairwise links and targeted tests or  
487 literature searches should prove or disprove the existence of predicted interactions. Although the  
488 dynamism of these networks is accounted for in our study (two separate networks were generated for  
489 the two sampling rounds), deep dynamical processes are not analysed. This limitation is the direct  
490 consequence of the lack of underpinning long-term datasets. This deficiency restricts our understanding  
491 of processes overarching several decades, such as climate change, the temporal patterns of exotic  
492 invasions, or continuous anthropogenic pressure, and likely prevents timely action to mitigate them  
493 (Poisot et al. 2015, Tulloch et al. 2016). Moreover, species co-occurrence networks may also depend on  
494 the seasonal dynamics of species of which we have little information. In this study, we did not focus on  
495 differences resulting from taxonomical or functional grouping but these, most likely, exist. Whereas this

496 approach would plausibly be a fruitful area of research, a complete dataset of traits is crucial and,  
497 besides taxonomy, a phylogenetic tree would also be desirable.

## 498 Conclusions

499 Here we show that changes in the topologies of arthropod co-occurrence networks in the Azores mirror  
500 variances both in biotic and abiotic environments and thus they can help to gain a deeper insight into  
501 natural and anthropogenic processes shaping island biogeography. Our findings demonstrate that  
502 although Azorean exotic species have little competition to indigenous, their presence affects species  
503 association networks and induce alarming reorganisations. Thus, developing standardised network  
504 assessment methods and utilizing network information may help in developing early warning systems  
505 for detecting the perilous impact of exotic species (Fath et al. 2019). Combining modern metabarcoding  
506 techniques and standardised statistical methods for association network-building with cutting-edge  
507 machine learning processes and literature-based trait data to routinely identify real-life interaction  
508 networks would substantially advance our understanding of ecological assembly rules and improve our  
509 predicting power to anticipate the future status of communities of high conservation interest (Evans et  
510 al. 2016). Fully exploiting this toolkit is vital for island biodiversity conservation.

511

## 512 References

- 513 Albrecht, J. et al. 2014. Correlated loss of ecosystem services in coupled mutualistic networks. - Nat  
514 Commun 5: 3810.
- 515 Araújo, M. B. et al. 2011. Using species co-occurrence networks to assess the impacts of climate change.  
516 - Ecography 34: 897–908.
- 517 Azevedo, E. B. et al. 1999. Modelling the local climate in island environments: water balance  
518 applications. - Agricultural Water Management 40: 393–403.

- 519 Barton, K. 2020. MuMIn: Multi-model inference. Version 1.46.0. [https://cran.r-](https://cran.r-project.org/package=MuMIn)  
520 [project.org/package=MuMIn](https://cran.r-project.org/package=MuMIn)
- 521 Bates, D. et al. 2015. Fitting linear mixed-effects models using lme4. - *Journal of Statistical Software* 67:  
522 1–48.
- 523 Blanchet, F. G. et al. 2020. Co-occurrence is not evidence of ecological interactions. - *Ecology Letters* 23:  
524 1050–1063.
- 525 Bohan, D. A. et al. 2011. Automated discovery of food webs from ecological data using logic-based  
526 machine learning. - *PLoS ONE* 6: e29028.
- 527 Bohan, D. A. et al. 2017. Next-generation global biomonitoring: large-scale, automated reconstruction of  
528 ecological networks. - *Trends in Ecology and Evolution* 32: 477–487.
- 529 Borges, P. A. V. et al. 2005. Ranking protected areas in the Azores using standardised sampling of soil  
530 epigeal arthropods. - *Biodivers Conserv* 14: 2029–2060.
- 531 Borges, P. A. V. et al. 2006. Invasibility and species richness of island endemic arthropods: a general  
532 model of endemic vs. exotic species. - *J Biogeography* 33: 169–187.
- 533 Borges, P. A. V. et al. 2010. The Azorean Biodiversity Portal: An internet database for regional  
534 biodiversity outreach. - *Systematics and Biodiversity* 8: 423–434.
- 535 Borges, P. et al. 2016. New records and detailed distribution and abundance of selected arthropod  
536 species collected between 1999 and 2011 in Azorean native forests. - *Biodiversity Data Journal*  
537 4: e10948.
- 538 Borges, P. A. V. et al. 2019. Biodiversity erosion: causes and consequences. - In: Leal Filho, W. et al. (eds),  
539 *Life on Land*. Springer Nature, pp. 1–10.
- 540 Borges, P. A. V. et al. 2020. Increase of insular exotic arthropod diversity is a fundamental dimension of  
541 the current biodiversity crisis. - *Insect Conserv Divers* 13: 508–518.
- 542 Boyer, A. G. and Jetz, W. 2014. Extinctions and the loss of ecological function in island bird communities.  
543 - *Global Ecology and Biogeography* 23: 679–688.
- 544 Burkle, L. A. et al. 2013. Plant-pollinator interactions over 120 years: loss of species, co-occurrence, and  
545 function. - *Science* 339: 1611–1615.
- 546 Cardoso, P. et al. 2010. Drivers of diversity in Macaronesian spiders and the role of species extinctions. -  
547 *Journal of Biogeography* 37: 1034–1046.
- 548 Cardoso, P. et al. 2020. Scientists' warning to humanity on insect extinctions. - *Biological Conservation*  
549 242: 108426.
- 550 Csárdi, G. and Nepusz, T. 2006. The igraph software package for complex network research. -  
551 *InterJournal Complex Systems* 1695: 1695.

- 552 Csermely, P. 2004. Strong links are important, but weak links stabilize them. - Trends in biochemical  
553 sciences 29: 331–4.
- 554 Delmas, E. et al. 2019. Analysing ecological networks of species interactions. - Biological Reviews 94: 16–  
555 36.
- 556 Derocles, S. A. P. et al. 2018. Biomonitoring for the 21st century: integrating next-generation sequencing  
557 into ecological network analysis. - In: Next Generation Biomonitoring: Part 1. Advances in  
558 ecological research. Elsevier Ltd., pp. 1–62.
- 559 Elo, M. et al. 2021. Species co-occurrence networks of ground beetles in managed grasslands. -  
560 Community Ecology 22: 29–40.
- 561 Evans, D. M. et al. 2016. Merging DNA metabarcoding and ecological network analysis to understand  
562 and build resilient terrestrial ecosystems. - Functional Ecology: 1904–1916.
- 563 Fath, B. D. et al. 2019. Ecological network analysis metrics: The need for an entire ecosystem approach  
564 in management and policy. - Ocean & Coastal Management 174: 1–14.
- 565 Fernández-Palacios, J. M. et al. 2021. Scientists’ warning – The outstanding biodiversity of islands is in  
566 peril. - Global Ecology and Conservation 31: e01847.
- 567 Florencio, M. et al. 2015. The colonisation of exotic species does not have to trigger faunal  
568 homogenisation: lessons from the assembly patterns of arthropods on oceanic islands. - PLOS  
569 ONE 10: e0128276.
- 570 Fridley, J. D. et al. 2007. Co-occurrence based assessment of habitat generalists and specialists: a new  
571 approach for the measurement of niche width. - Journal of Ecology 95: 707–722.
- 572 García, D. et al. 2014. Exotic birds increase generalization and compensate for native bird decline in  
573 plant–frugivore assemblages. - Journal of Animal Ecology 83: 1441–1450.
- 574 Gaspar, C. et al. 2008. Diversity and distribution of arthropods in native forests of the Azores  
575 archipelago. - Arquipelago Life and marine Sciences 25: 1–30.
- 576 Gillespie, R. G. and Roderick, G. K. 2002. Arthropods on islands: colonization, speciation, and  
577 conservation. - Annual review of entomology 47: 595–632.
- 578 Griffith, D. M. et al. 2016. Cooccur: probabilistic species co-occurrence analysis in R. - Journal of  
579 Statistical Software 69: 1–17.
- 580 Hallmann, C. A. et al. 2021. Insect biomass decline scaled to species diversity: General patterns derived  
581 from a hoverfly community. - PNAS 118: e2002554117.
- 582 Heleno, R. H. et al. 2013. Integration of exotic seeds into an Azorean seed dispersal network. - Biol  
583 Invasions 15: 1143–1154.
- 584 Heleno, R. H. et al. 2020. Scientists’ warning on endangered food webs. - Web Ecology 20: 1–10.

- 585 Hines, J. et al. 2015. Towards an integration of biodiversity–ecosystem functioning and food web theory  
586 to evaluate relationships between multiple ecosystem services. - In: Woodward, G. and Bohan,  
587 D. A. (eds), *Advances in Ecological Research. Ecosystem Services*. Academic Press, pp. 161–199.
- 588 Hui, C. 2021. Introduced species shape insular mutualistic networks. - *PNAS* 118: e2026396118.
- 589 Hui, C. and Richardson, D. M. 2018. How to invade an ecological network. - *Trends in Ecology &*  
590 *Evolution* 34: 121–131.
- 591 Kay, G. M. et al. 2018. Species co-occurrence networks show reptile community reorganization under  
592 agricultural transformation. - *Ecography* 41: 113–125.
- 593 Kuznetsova, A. et al. 2017. lmerTest package: Tests in linear mixed effects models. - *Journal of Statistical*  
594 *Software* 82: 1–26.
- 595 Laliberté, E. and Tylianakis, J. M. 2010. Deforestation homogenizes tropical parasitoid–host networks. -  
596 *Ecology* 91: 1740–1747.
- 597 Larson, D. L. et al. 2016. Exotic plant infestation is associated with decreased modularity and increased  
598 numbers of connectors in mixed-grass prairie pollination networks. - *PLOS ONE* 11: e0155068.
- 599 Lima-Mendez, G. et al. 2015. Determinants of community structure in the global plankton interactome. -  
600 *Science* 348: 1262073.
- 601 Ma, B. et al. 2016. Geographic patterns of co-occurrence network topological features for soil  
602 microbiota at continental scale in eastern China. - *ISME J* 10: 1891–1901.
- 603 Matthews, T. J. 2021. On the biogeography of habitat islands: the importance of matrix effects, noncore  
604 species, and source-sink dynamics. - *The Quarterly Review of Biology* 96: 73–104.
- 605 Oksanen, J. et al. 2010. vegan: Community ecology package. Version 2.5.7. [https://cran.r-](https://cran.r-project.org/package=vegan)  
606 [project.org/package=vegan](https://cran.r-project.org/package=vegan)
- 607 Pozsgai, G. et al. 2016. Interspecific networks in ground beetle (Coleoptera: Carabidae) assemblages. -  
608 *Ecological Indicators* 68: 134–141.
- 609 Pyšek, P. et al. 2020. Scientists’ warning on invasive alien species. - *Biological Reviews* 95: 1511–1534.
- 610 R Core Team 2012. R: A language and environment for statistical computing. Version 4.1.1.  
611 <https://cran.r-project.org>
- 612 Rego, C. et al. 2019. Taxonomic and functional diversity of insect herbivore assemblages associated with  
613 the canopy-dominant trees of the Azorean native forest. - *PLOS ONE* 14: e0219493.
- 614 Ribeiro, S. P. et al. 2005. Canopy insect herbivores in the Azorean Laurisilva forests: key host plant  
615 species in a highly generalist insect community. - *Ecography* 28: 315–330.

- 616 Rigal, F. et al. 2018. Functional traits of indigenous and exotic ground-dwelling arthropods show  
617 contrasting responses to land-use change in an oceanic island, Terceira, Azores (A Andersen,  
618 Ed.). - *Divers Distrib* 24: 36–47.
- 619 Rocha, J. C. et al. 2015. Regime shifts in the Anthropocene: Drivers, risks, and resilience. - *PLoS ONE* 10:  
620 e0134639.
- 621 Sax, D. F. et al. 2002. Species invasions exceed extinctions on islands worldwide: a comparative study of  
622 plants and birds. - *The American Naturalist* 160: 766–783.
- 623 Seibold, S. et al. 2019. Arthropod decline in grasslands and forests is associated with landscape-level  
624 drivers. - *Nature* 574: 671–674.
- 625 Strydom, T. et al. 2021. A roadmap toward predicting species interaction networks (across space and  
626 time). - *Philosophical Transactions of The Royal Society B Biological Sciences* 376: 20210063.
- 627 Triantis, K. A. et al. 2010. Extinction debt on oceanic islands. - *Ecography* 33: 285–294.
- 628 Tylianakis, J. M. et al. 2010. Conservation of species interaction networks. - *Biological Conservation* 143:  
629 2270–2279.
- 630 Valido, A. and Olesen, J. M. 2022. Pollination on islands: examples from the Macaronesian archipelagos.  
631 - In: Serrano, A. R. M. et al. (eds), *Terrestrial arthropods of Macaronesia - biodiversity, ecology*  
632 *and evolution*. Fundação para a Ciência e a Tecnologia, pp. 249–283.
- 633 Valiente-Banuet, A. et al. 2015. Beyond species loss: The extinction of ecological interactions in a  
634 changing world. - *Functional Ecology* 29: 299–307.
- 635 Veech, J. A. 2006. A probability-based analysis of temporal and spatial co-occurrence in grassland birds. -  
636 *J Biogeography* 33: 2145–2153.
- 637 Wagner, D. L. 2020. Insect declines in the Anthropocene. - *Annual Review of Entomology* 65: 457–480.
- 638 Whittaker, R. J. et al. 2014. Functional biogeography of oceanic islands and the scaling of functional  
639 diversity in the Azores. - *PNAS* 111: 13709–13714.
- 640 Whittaker, R. J. et al. 2017. Island biogeography: Taking the long view of nature’s laboratories. - *Science*  
641 357: eaam8326.

642

643

## 644 Author contributions

645 G.P. and P.A.V.B. conceived the idea. Data were collected by the contributors of the BALA dataset  
646 (Borges et al. 2016) and the environmental data were provided by E.B.A. Data analysis was conducted by

647 G.P., who also wrote the first version of the manuscript. The first draft was edited by P.C., F.R., M.B., and  
648 P.A.V.B. The necessary funds were acquired by P.A.V.B. All authors contributed to editing the  
649 manuscript. All authors have read the manuscript and agreed with its content.

## 650 [Data archiving statement](#)

651 Species list and distribution data are openly available in Borges et al. (2016). Computer codes, along with  
652 summary environmental data will be made available on GitHub upon publication.

## 653 [Conflict of interest statement](#)

654 The authors claim no conflict of interest.

## 655 [Funding statement](#)

656 This work was funded by a Research Program Contract for the Center for Ecology, Evolution and  
657 Environmental Changes (cE3c), through programmatic funding with a contract to GP (FCT-  
658 UIDP/00329/2020) and research pluriannual funds for cE3c (FCT-UIDB/00329/2020). MB was supported  
659 by contract DL57/2016/CP1375/CT0001.

## 660 [Acknowledgements](#)

661 We are grateful to all colleagues that contributed to data acquisition during BALA 1 and BALA 2  
662 fieldwork.

663 .

- 664 **Supplementary material 1. Network measures calculated in the study and their ecological importance.**
- 665 **Supplementary material 2. List of all species in the meta-network with their taxonomic grouping**  
666 **(Order, Family), nativity categorisation, and calculated node measures.**
- 667 **Supplementary material 3. Comparison of network properties of island subnetworks. Pirate plots**  
668 **show the distribution of the data, the median, and the lower and higher quartiles. Kruskal-Wallis**  
669 **tests are displayed, and pairwise differences are also shown if Wilcoxon tests are significant after**  
670 **adjusting p-values with the FDR method.**
- 671 **Supplementary material 4. Preferential pairing between endemic, native, and exotic species. P-values**  
672 **of the one-sided t-tests comparing the measured and expected values from the simulation process are**  
673 **shown for all links and negative links only (A). The results of proportion tests between the frequencies**  
674 **of links between exotics – natives and natives – natives (B), exotics – endemics and endemics –**  
675 **endemics (C), and exotics – indigenous and indigenous – indigenous (D) species.**
- 676 **Supplementary material 5. Relationship between the number of exotic species and major network**  
677 **properties in networks consisting of all species.**
- 678 **Supplementary material 6. Relationship between the number of exotic species and the residuals of**  
679 **the model fitted against the major network properties in networks consisting of indigenous species**  
680 **only.**
- 681 **Supplementary material 7. Differences between the node properties of indigenous and exotic species.**
- 682 **Supplementary material 8. Relationship between the number of exotic species and major network**  
683 **properties in networks consisting of only native species.**
- 684 **Supplementary material 9. Correlation between all network properties, environmental variables, and**  
685 **between network properties and environmental variables.**



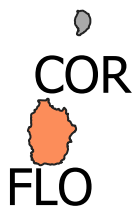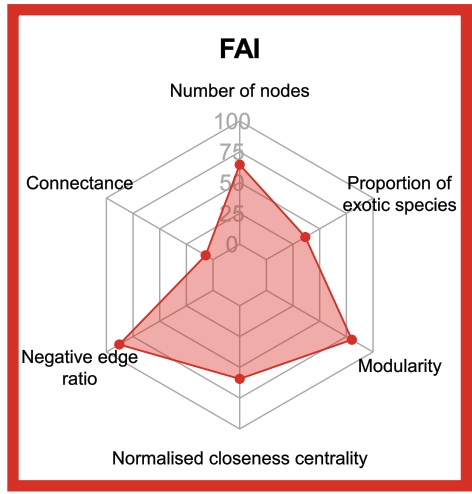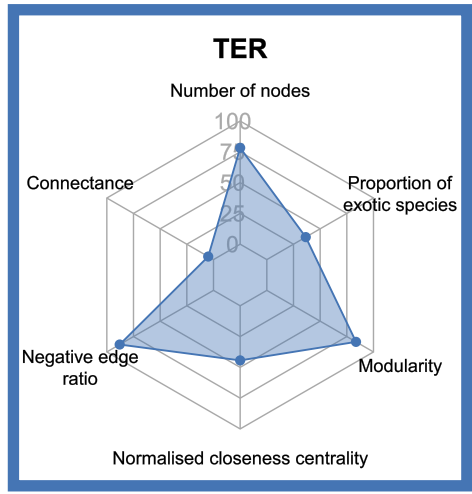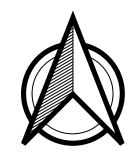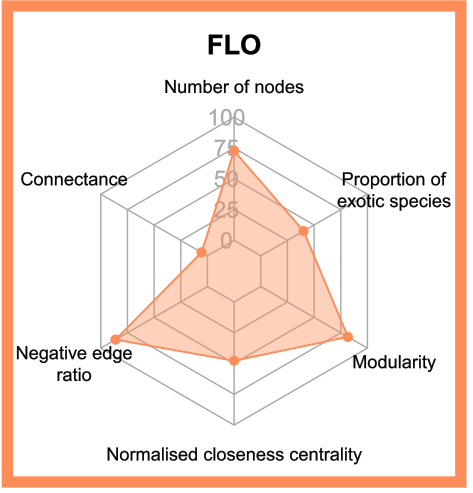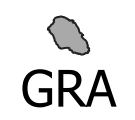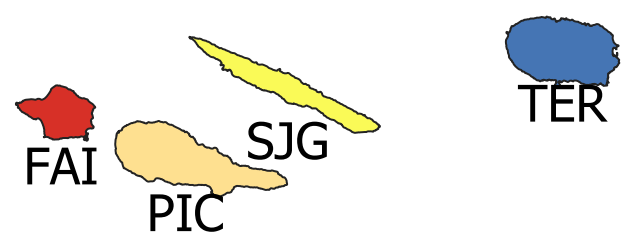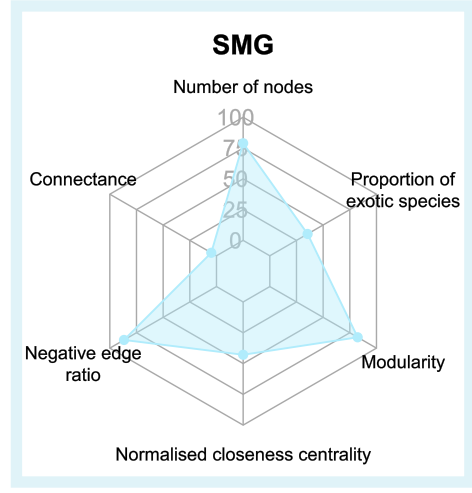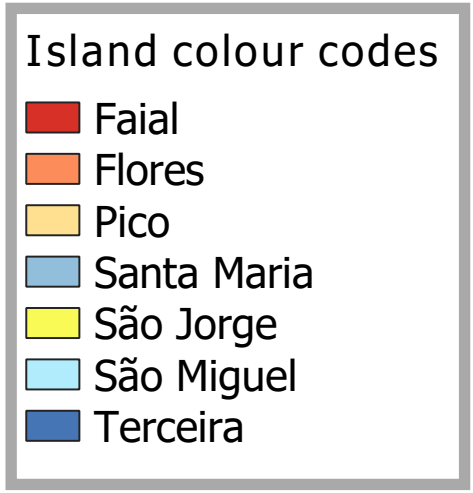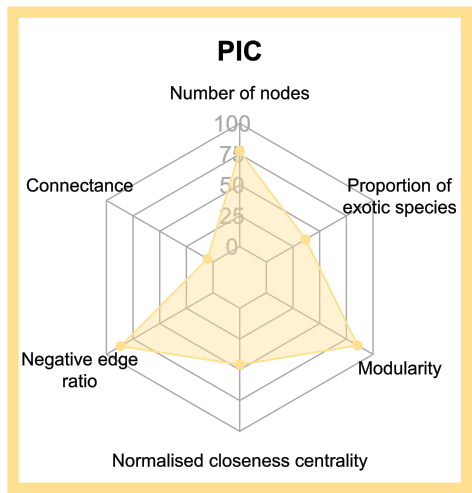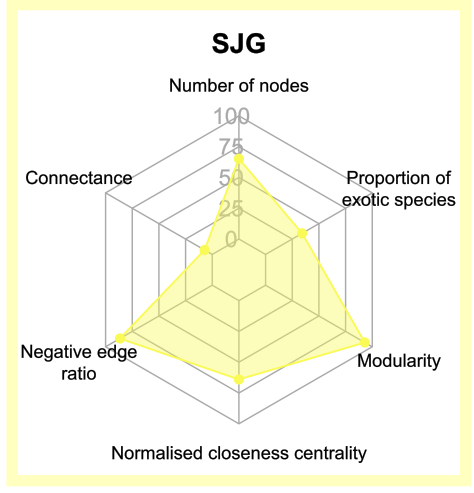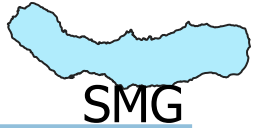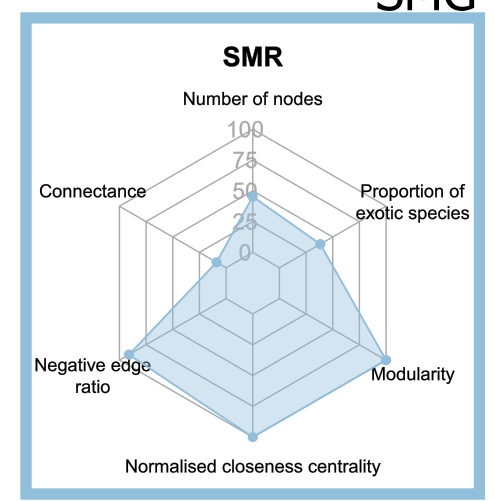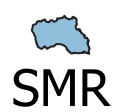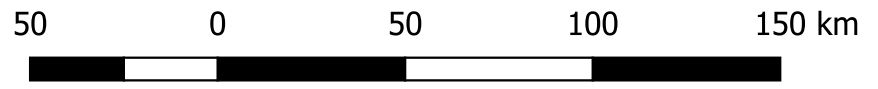



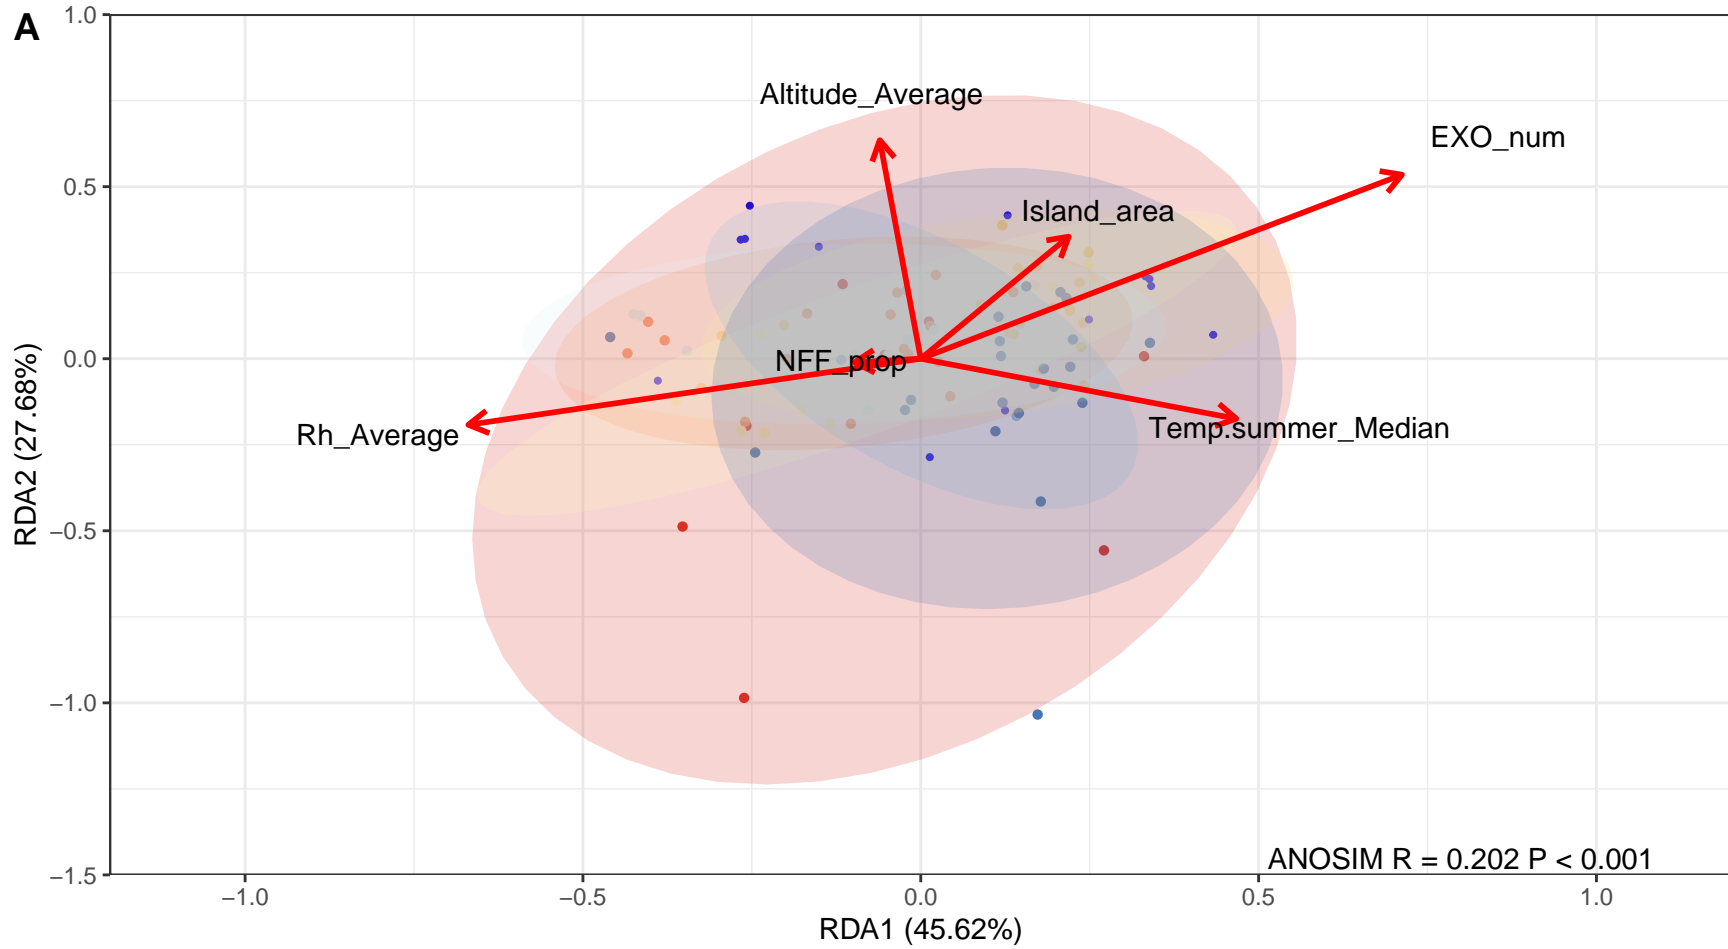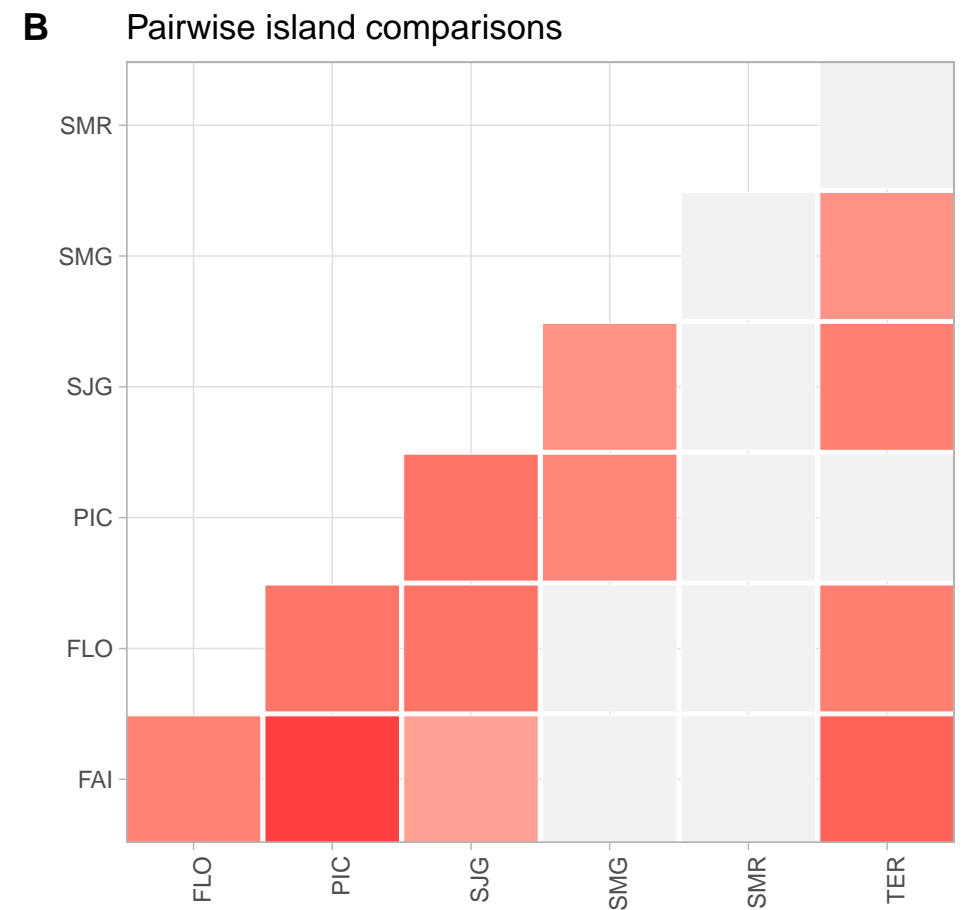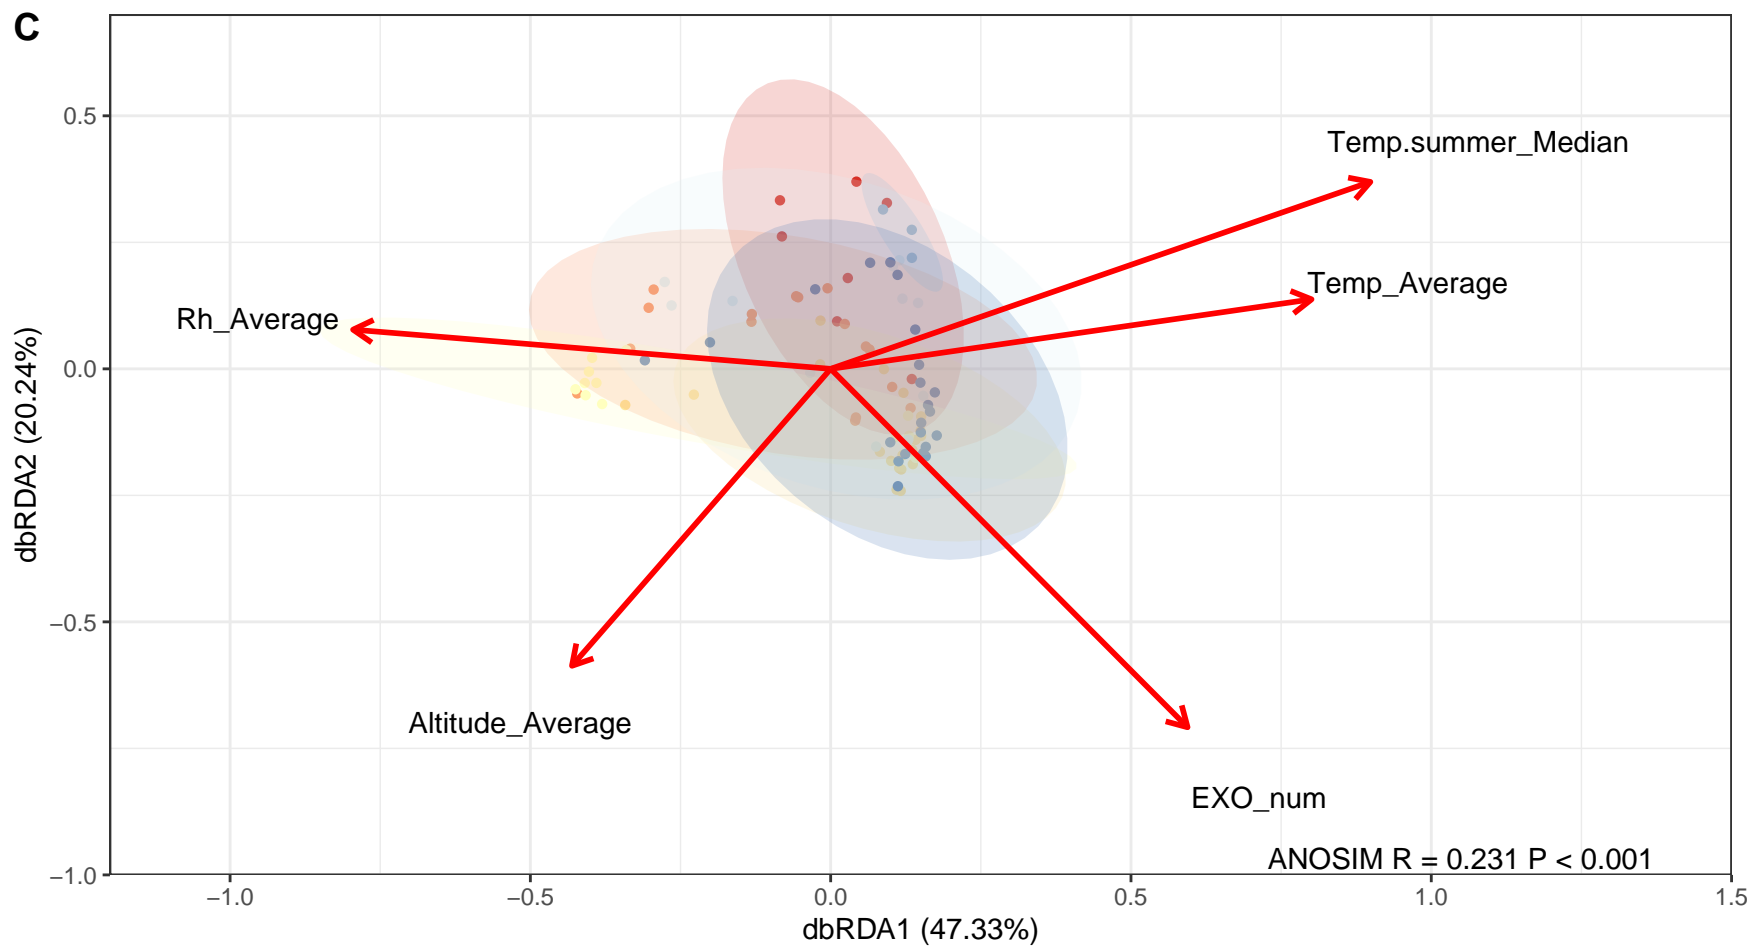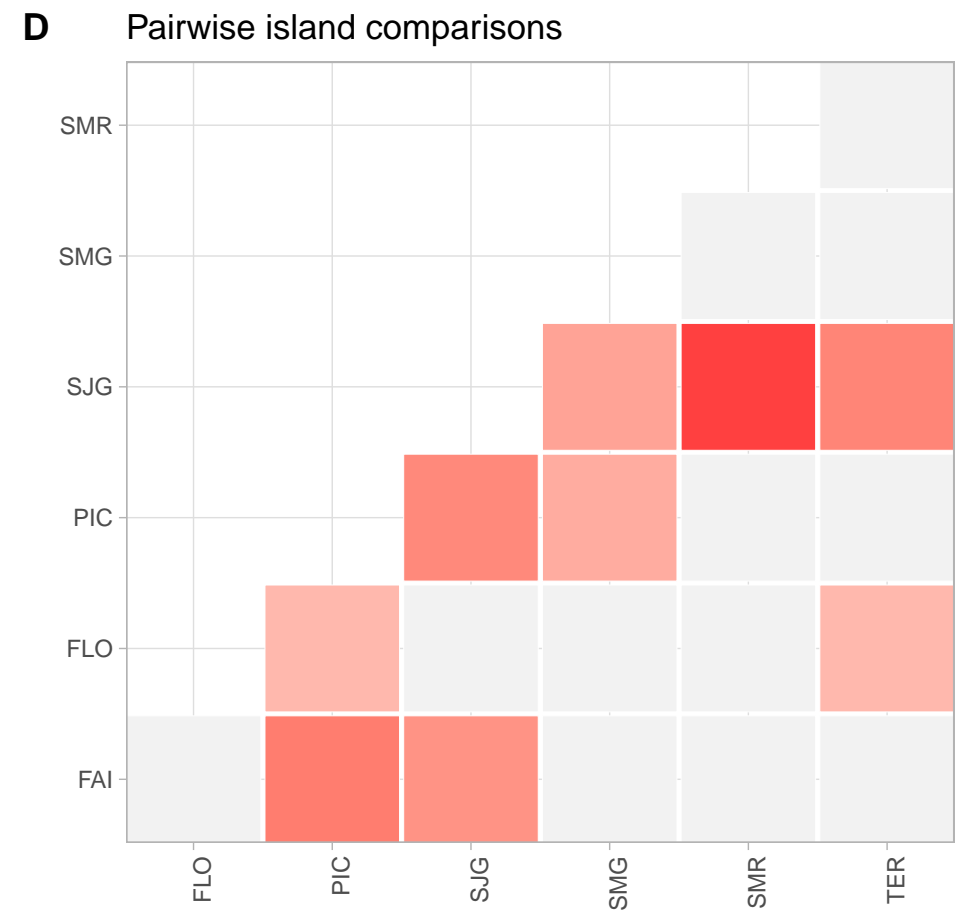

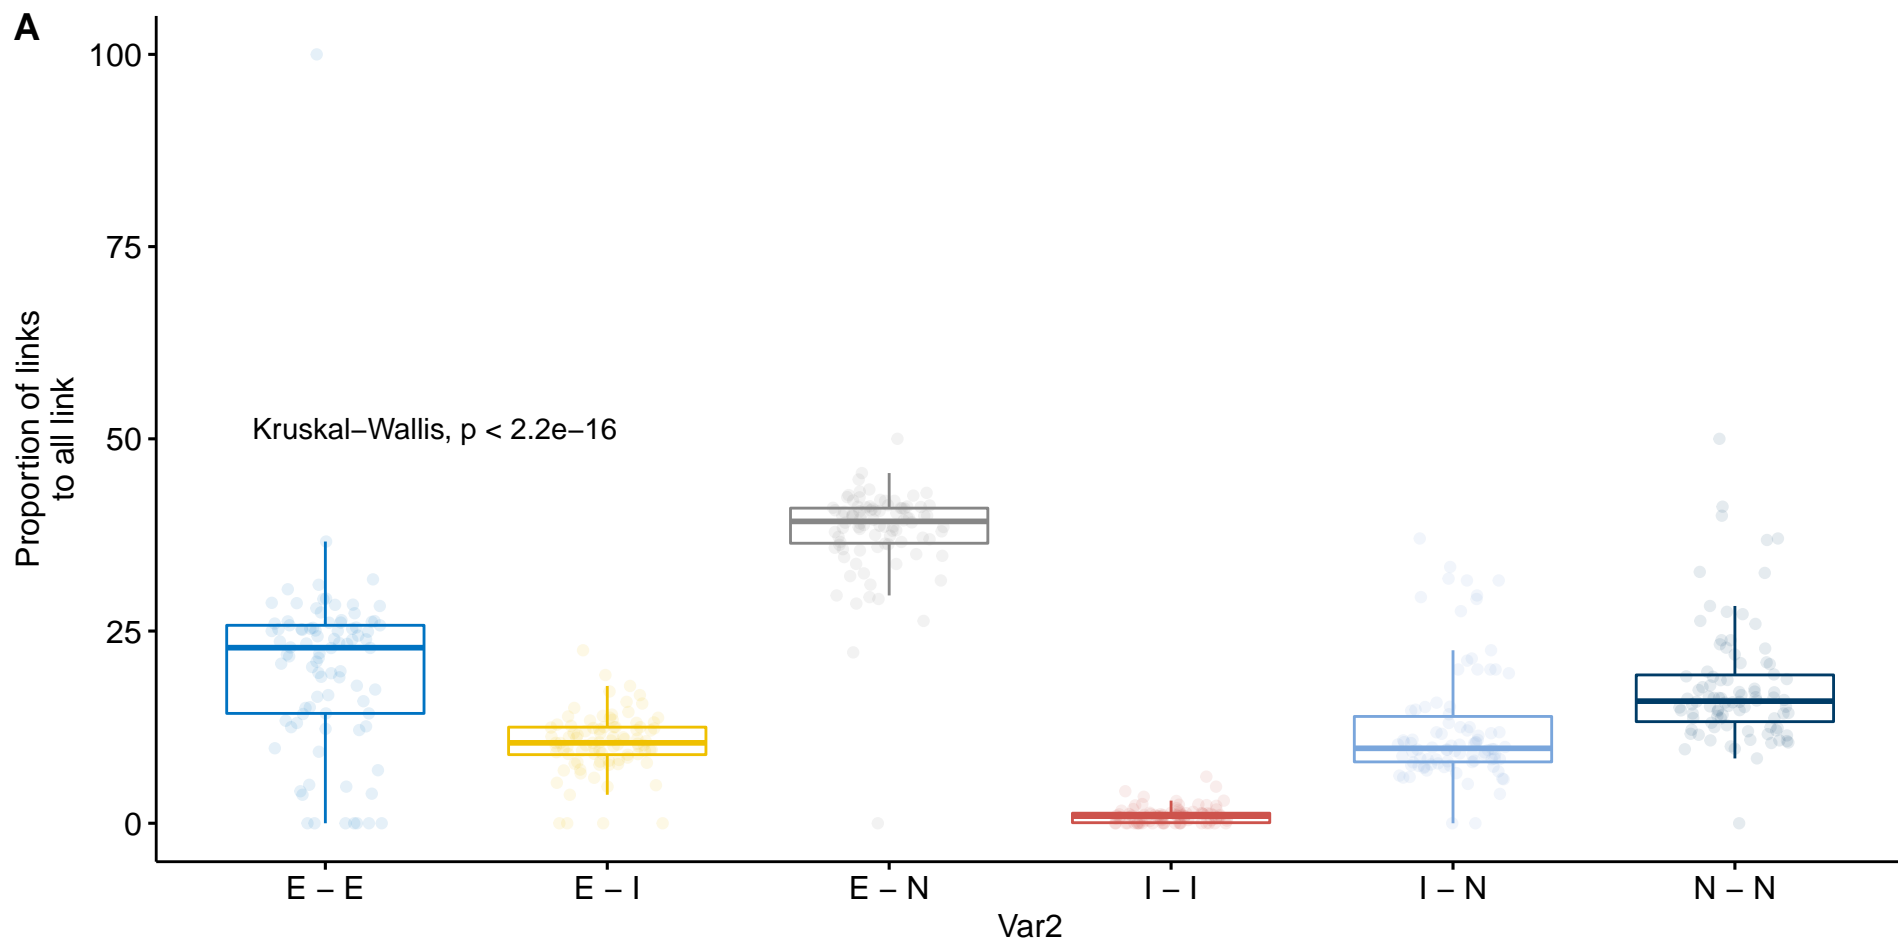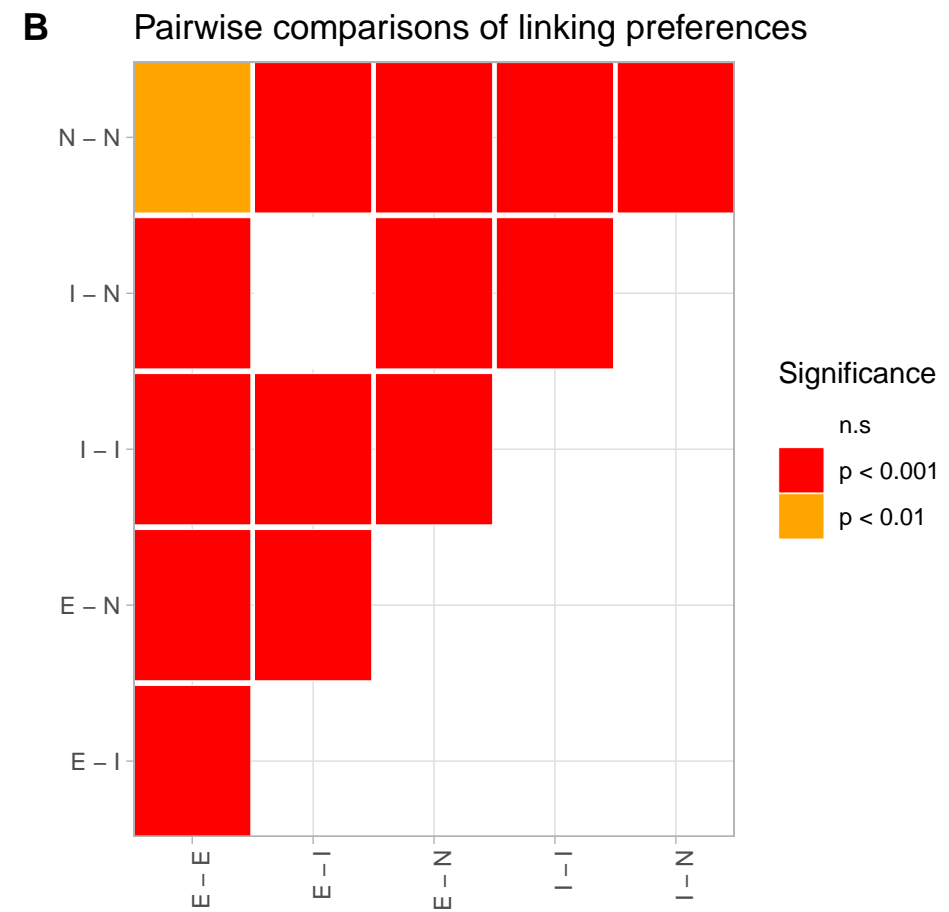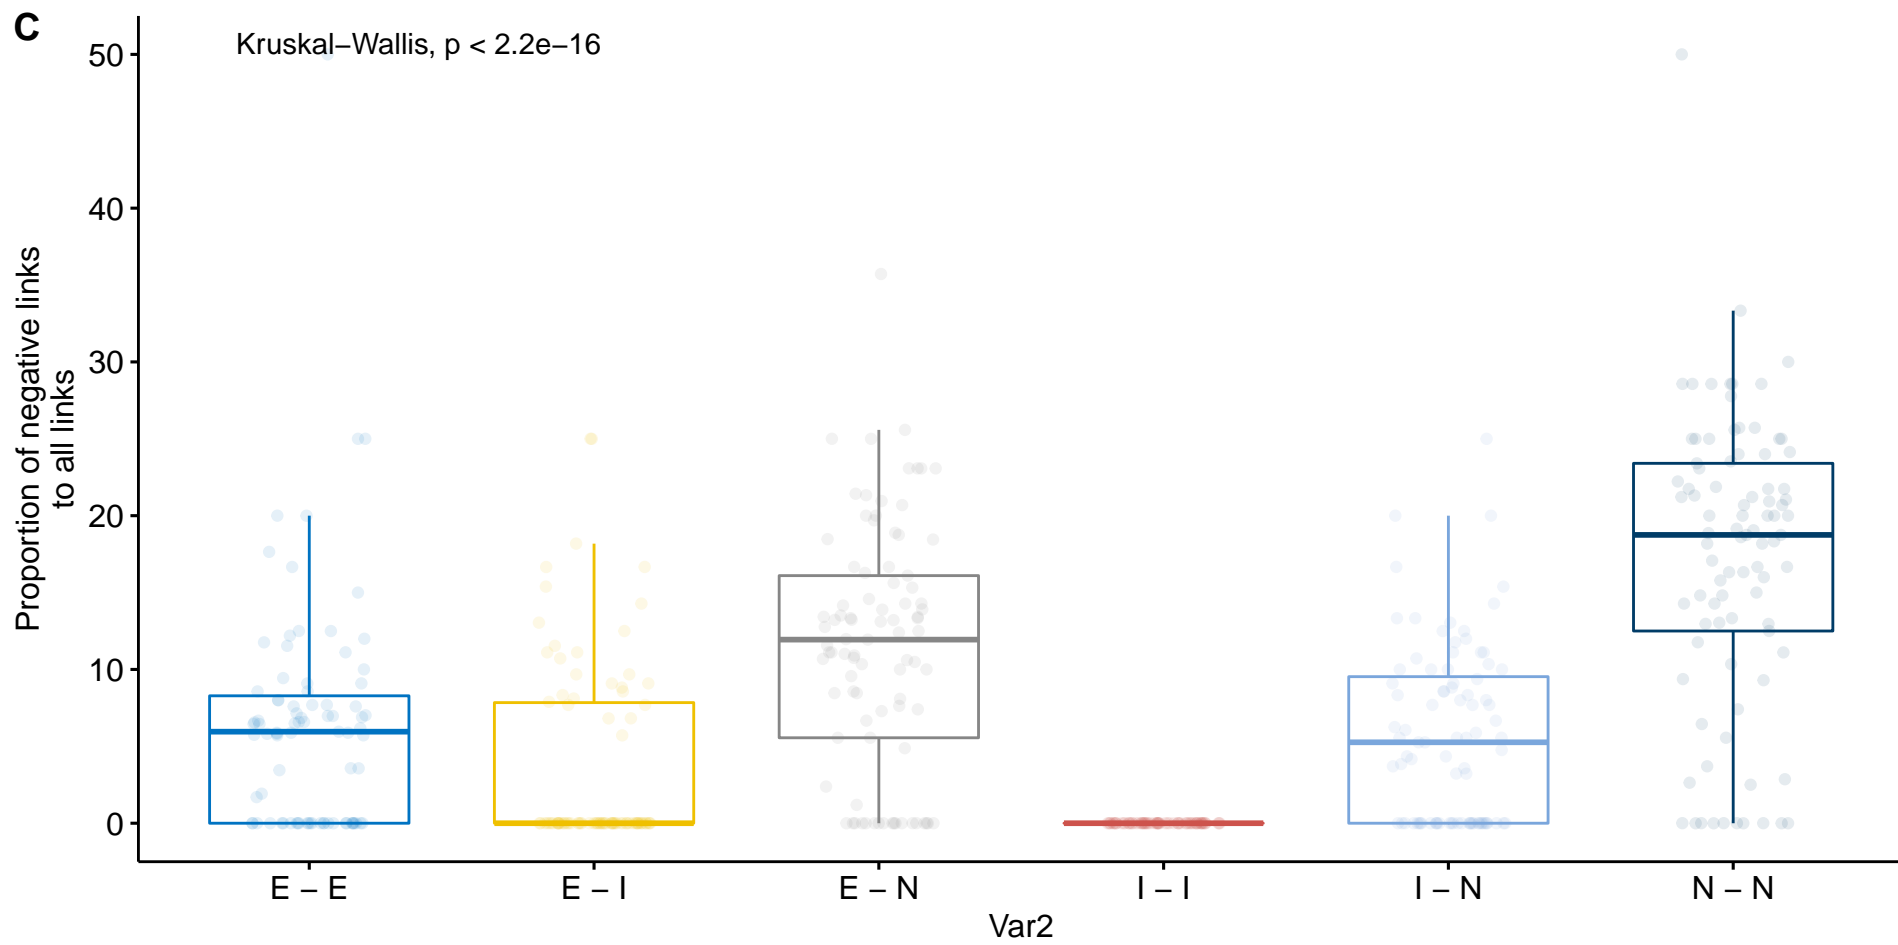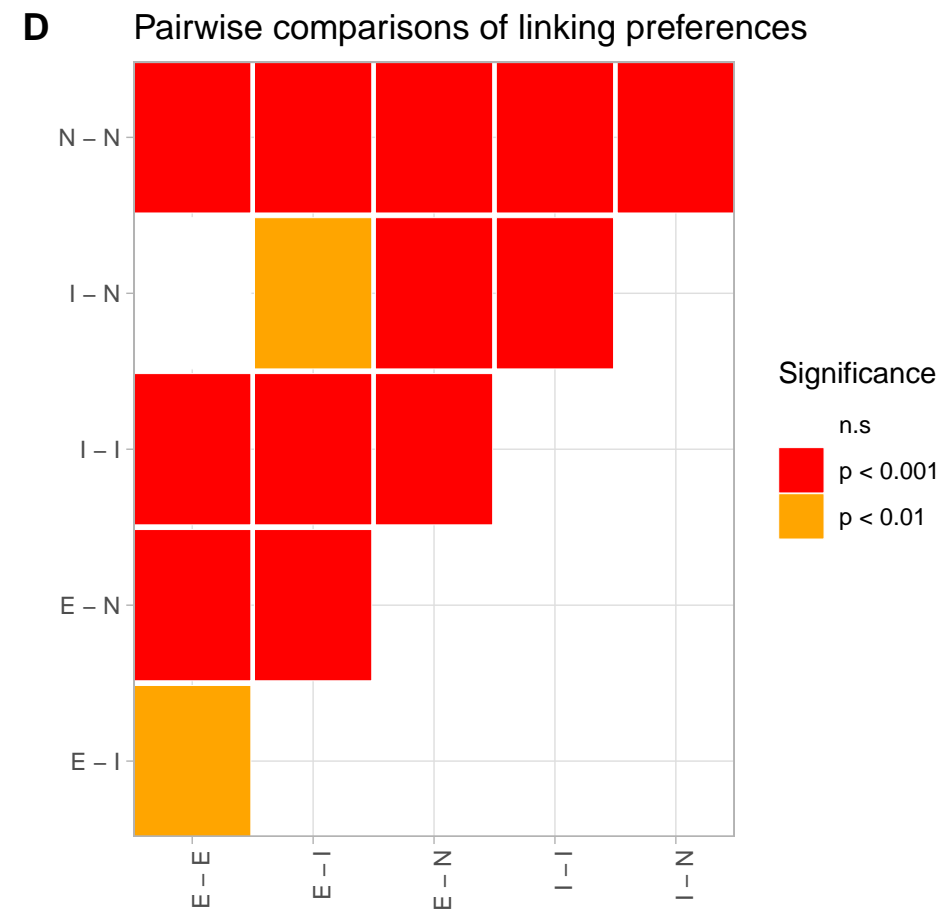

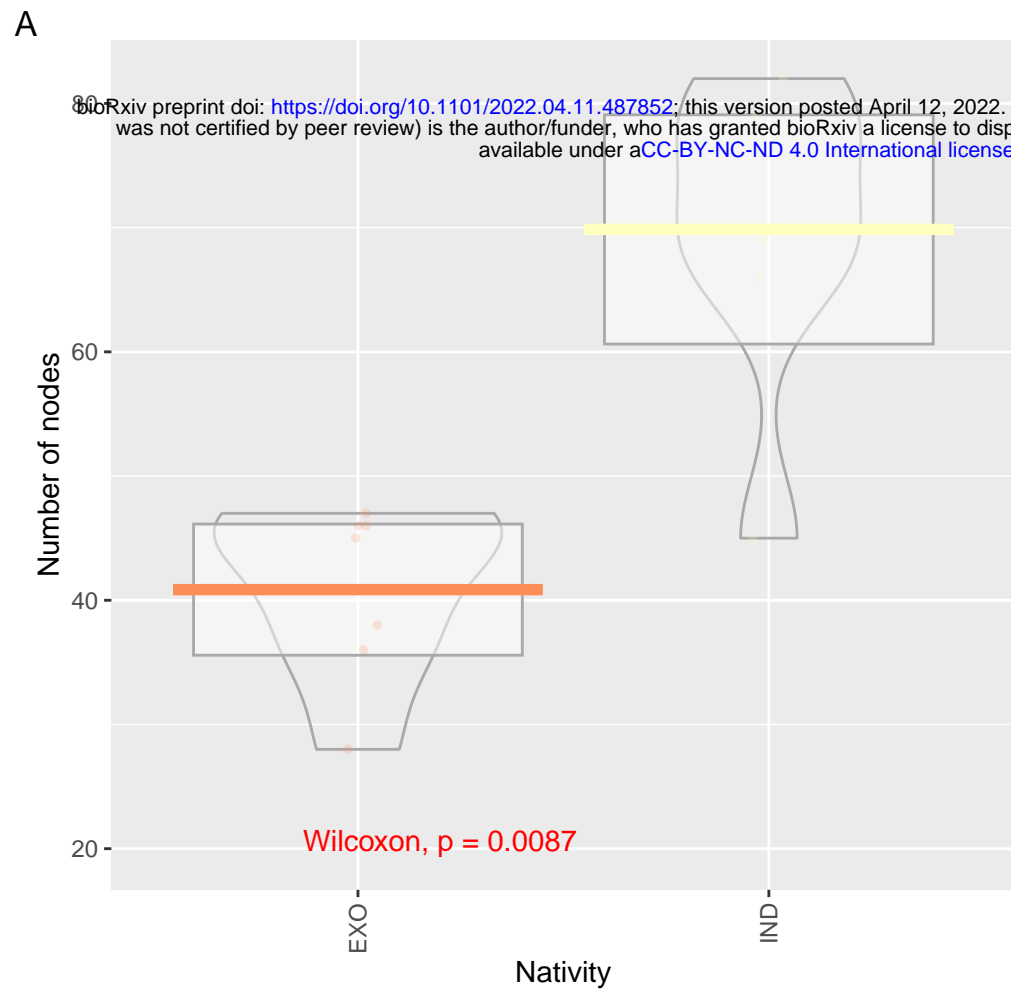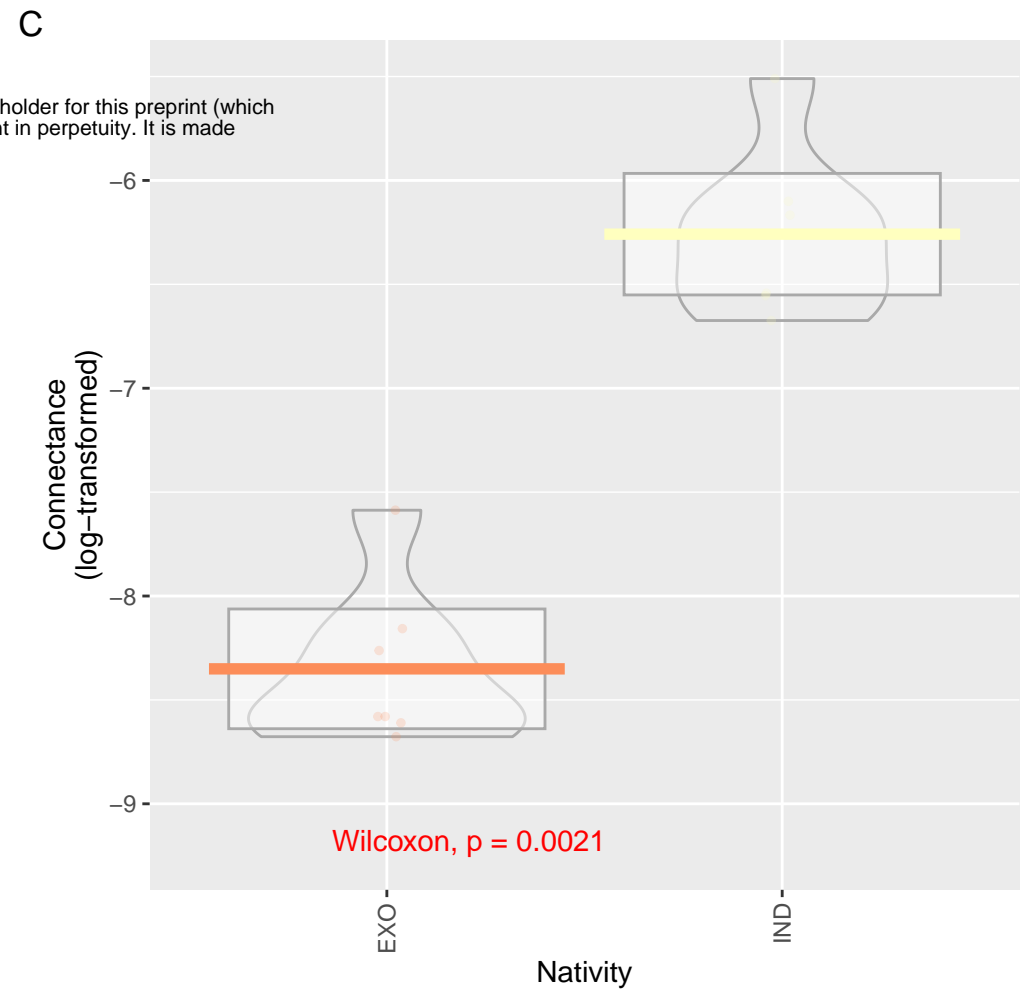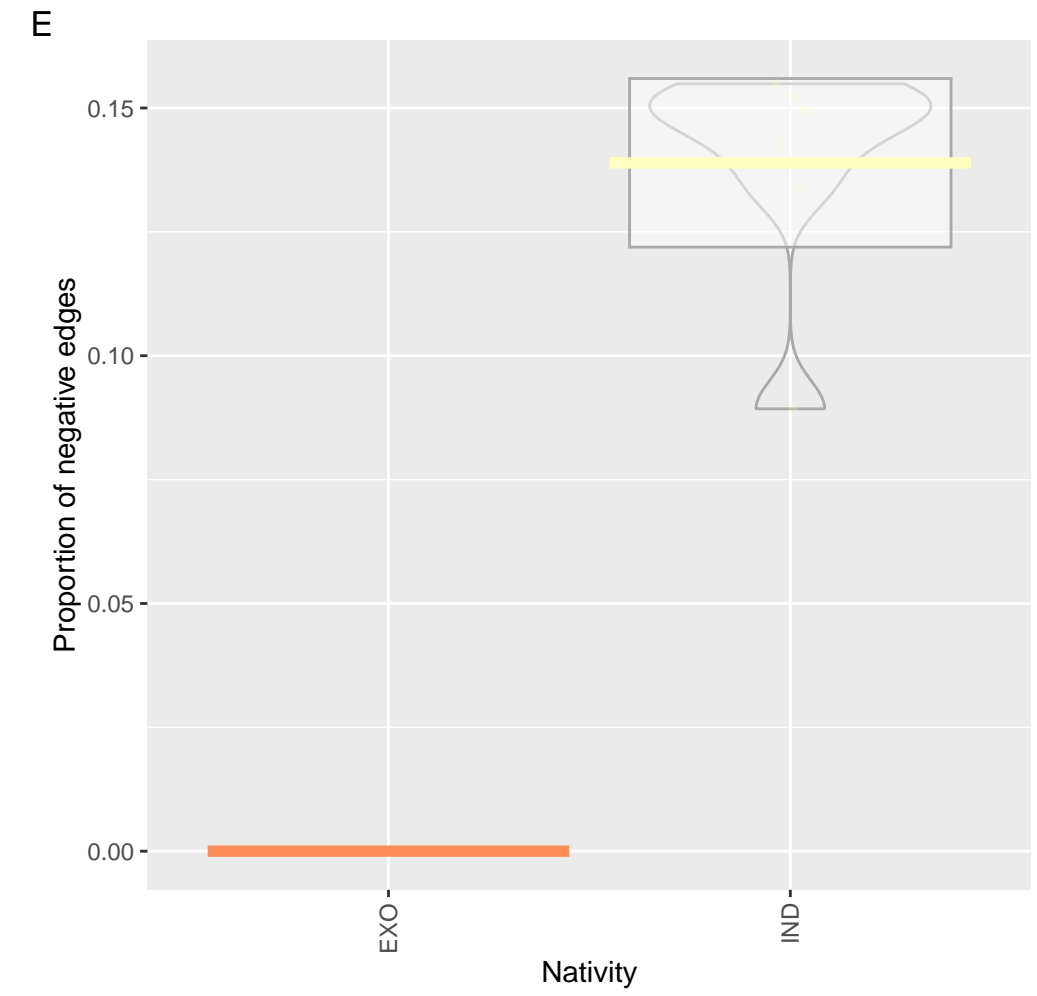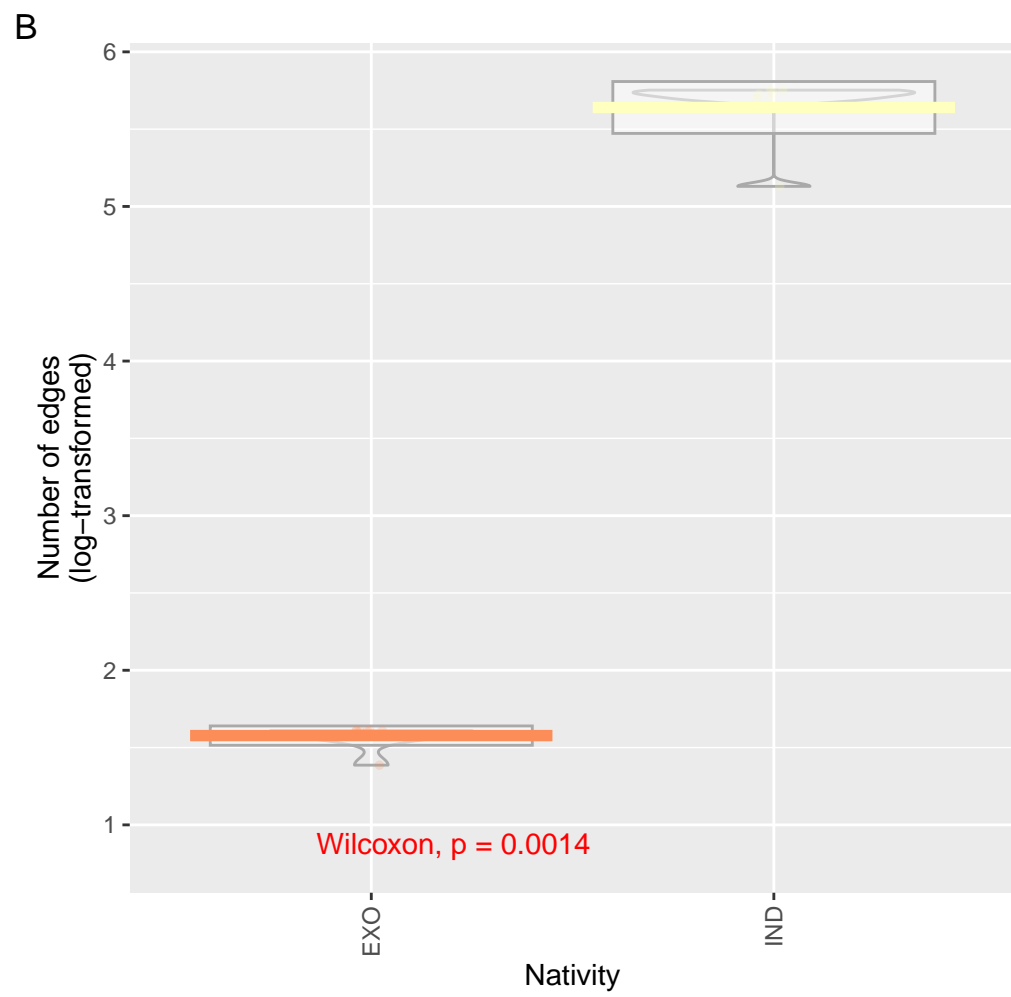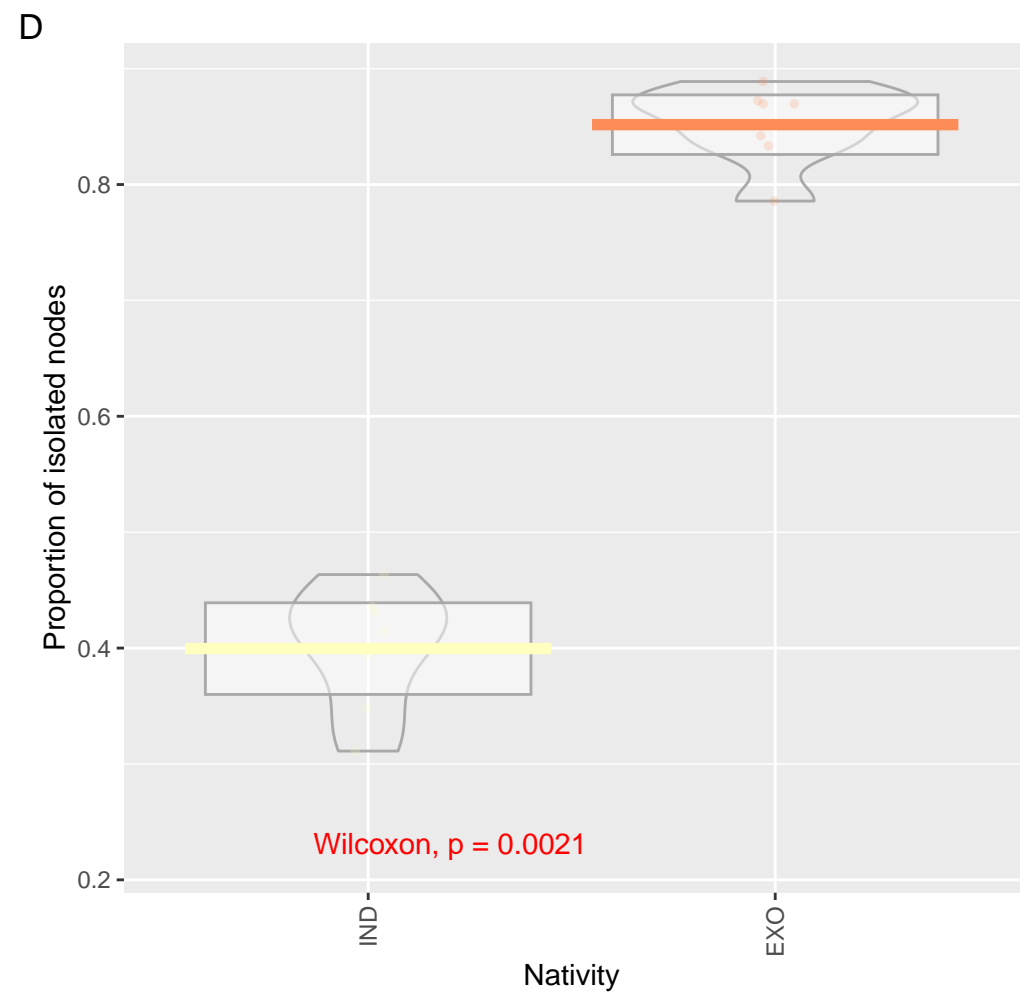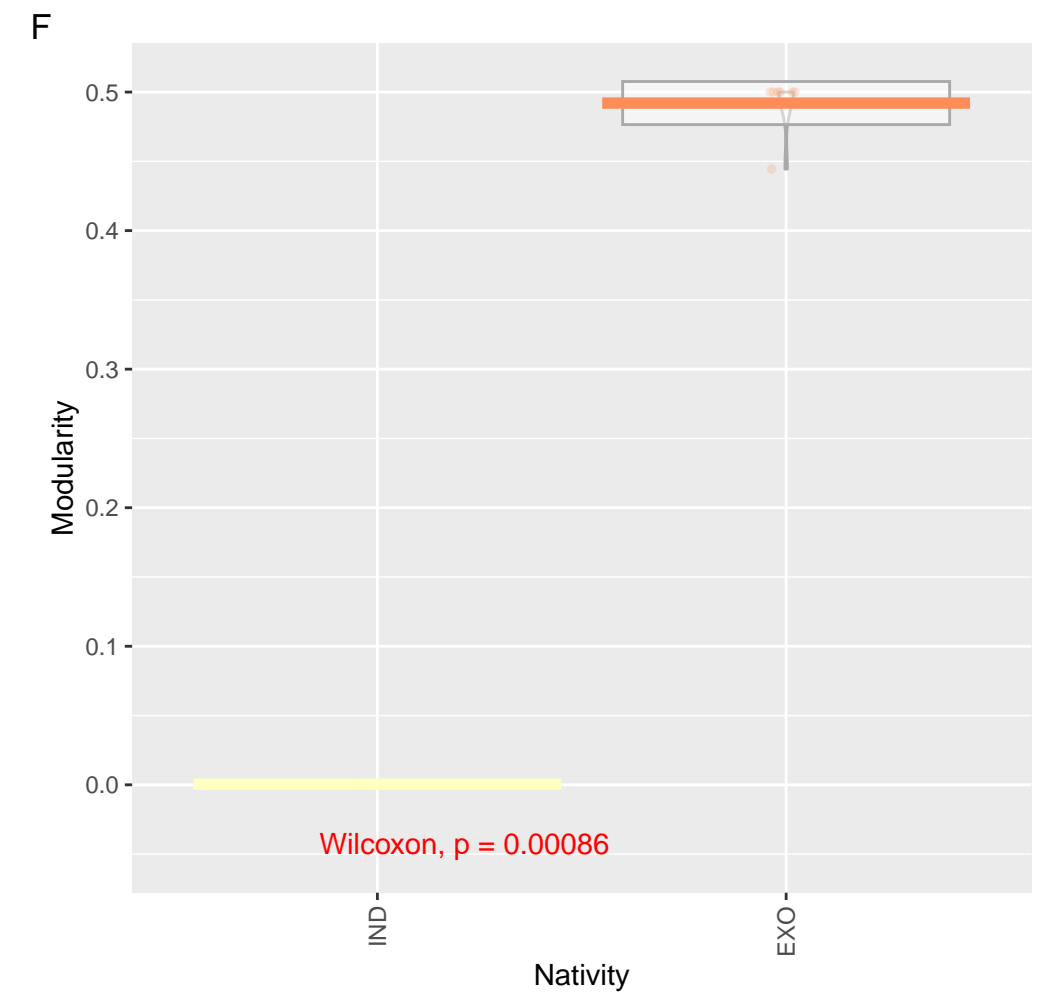

Source: https://www.biorxiv.org/content/10.1101/2022.04.11.487852v1.full.pdf
